# Supplementary material
Source: PubMed Central journal article supplement (PMC5330661)
Supplement: ol6b03423_si_001.pdf [file ol6b03423_si_001.pdf]

# SUPPORTING INFORMATION

## Photocontrol of Anion Binding Affinity to a Bis-Urea Receptor Derived from Stiff-Stilbene

Sander J. Wezenberg,\* and Ben L. Feringa

*Stratingh Institute for Chemistry, University of Groningen,  
Nijenborgh 4, 9747 AG, Groningen, The Netherlands*

Email: s.j.wezenberg@rug.nl

### Table of contents

|                                                                       |     |
|-----------------------------------------------------------------------|-----|
| Experimental Section .....                                            | S2  |
| <sup>1</sup> H and <sup>13</sup> C NMR Spectra of new compounds ..... | S5  |
| <sup>1</sup> H NMR photoisomerization studies.....                    | S16 |
| Quantum yield determination.....                                      | S17 |
| <sup>1</sup> H NMR titration experiments .....                        | S18 |
| Job plot and titration curve analysis.....                            | S27 |
| Geometry optimizations by DFT.....                                    | S32 |
| References .....                                                      | S37 |

## Experimental Section

### General methods and materials:

THF, toluene and CH<sub>2</sub>Cl<sub>2</sub> were dried by using an MBraun solvent purification system. Dry DMSO and DMSO-*d*<sub>6</sub> were purchased from Acros Organics and were stored under N<sub>2</sub> over molecular sieves (4Å). The degassing of solvents was carried out by purging with N<sub>2</sub> for 30 min. All other chemicals were commercial products and were used as received. Flash chromatography (FC) was performed using silica gel (SiO<sub>2</sub>) purchased from Merck (type 9385, 230-400 mesh) and thin-layer chromatography (TLC) was carried out on aluminum sheets coated with silica 60 F254 obtained from Merck; compounds were visualized with a UV lamp (254 nm) or by staining with phosphomolybdic acid (PMA). Melting points (m.p.) were determined using a Büchi-B545 capillary melting point apparatus. <sup>1</sup>H and <sup>13</sup>C spectra were recorded on Varian Mercury-Plus 400 and Varian Mercury-Plus 600 spectrometers at 298K unless indicated otherwise. Chemical shifts ( $\delta$ ) are denoted in parts per million (ppm) relative to DMSO-*d*<sub>6</sub> (for <sup>1</sup>H detection,  $\delta$  = 2.50 ppm; for <sup>13</sup>C detection,  $\delta$  = 39.52 ppm). Due to poor solubility, DMSO and H<sub>2</sub>O peaks in the NMR spectra are larger than the compound peaks. The splitting pattern of peaks is designated as follows: s (singlet), d (doublet), t (triplet), (multiplet), br (broad), or dd (doublet of doublets). High-resolution mass spectrometry (ESI-MS) was performed on a LTQ Orbitrap XL spectrometer with ESI ionization. UV-vis spectra were recorded on Specord S600 and Hewlett-Packard HP 8543 diode arrays, equipped with a Quantum Northwest Peltier controller, in a 1 cm or 1 mm quartz cuvette. Irradiation of UV-vis samples was carried out at 20 °C using a Thorlab model M365F1 high-power LED (4.1 mW) and a Thorlab model M385F1 high-power LED (10.7 mW) positioned at a distance of 1 cm. NMR irradiation studies were performed at 20 °C with a Thorlab model M365FP1 high-power LED (15.5 mW) and a Thorlab model M385FP1 high-power LED (23.2 mW) coupled to a 600  $\mu$ m optical fiber, which guided the light into the NMR tube inside the spectrometer.<sup>1</sup>

### **(E)/(Z)-6,6'-dibromo-2,2',3,3'-tetrahydro-1,1'-biindenylidene [(E)/(Z)-2]:**

Titanium(IV) chloride (3.30 mL, 30.0 mmol) was slowly added to zinc powder (3.93 g, 60.0 mmol) in THF (30 mL) under a N<sub>2</sub> atmosphere and under vigorous stirring. The solution was stirred at reflux for 2 h and cooled back to rt, after which solid 6-bromo-1-indanone (3.17 g, 15.0 mmol) was added to the black suspension. The mixture was stirred at reflux for a further 24 h, treated with a saturated aqueous NH<sub>4</sub>Cl solution, and extracted with CHCl<sub>3</sub> (3  $\times$  100

mL). The volume of the combined extracts was reduced to 30 mL and the precipitate was filtered off and air-dried to afford (*E*)-**2** (842 mg, 29%) as an off-white solid; m.p. 240.7 – 242.6 °C; <sup>1</sup>H NMR (400 MHz, DMSO-*d*<sub>6</sub>, (*E*)-geometry assignment based on a NOESY spectrum): 7.68 (d, *J* = 1.8 Hz, 2H; 2 arom. H), 7.42 (dd, *J* = 8.0, 1.7 Hz, 2H; 2 arom. H), 7.33 (d, *J* = 8.0 Hz, 2H; 2 arom. H), 3.14-3.02 (m, br. 8H; 4 CH<sub>2</sub>); too insoluble for a <sup>13</sup>C NMR measurement. The filtrate was concentrated and FC (SiO<sub>2</sub>, pentane) afforded (*Z*)-**2** (673 mg, 23%) as a white solid; m.p. 137.6 – 139.9 °C; <sup>1</sup>H NMR (400 MHz, DMSO-*d*<sub>6</sub>): 8.01 (s, 2H; 2 arom. H), 7.40 (d, *J* = 8.0, 2H; 2 arom. H), 7.32 (d, *J* = 8.2 Hz, 2H; 2 arom. H), 2.95-2.89 (m, br. 4H; 2 CH<sub>2</sub>), 2.92-2.75 (m, br. 4H; 2 CH<sub>2</sub>); <sup>13</sup>C NMR (100 MHz, DMSO-*d*<sub>6</sub>): 147.6, 141.8, 135.1, 130.1, 127.5, 125.0, 118.7, 34.4, 29.6.

**(*E*)-2,2',3,3'-tetrahydro-(1,1'-biindenylidene)-6,6'-diamine [(*E*)-**3**]:**

Compound (*E*)-**2** (960 mg, 2.46 mmol), palladium(II) acetate (44 mg, 0.20 mmol), DPPF (136 mg, 0.25 mmol) and sodium tert-butoxide (473 mg, 4.92 mmol) were brought under a N<sub>2</sub> atmosphere in a Schlenk tube via three vacuum/N<sub>2</sub> cycles. Then degassed toluene (12 mL) was added, followed by benzophenone imine (1.03 mL, 6.15 mmol). The mixture was stirred at 90 °C for 20 h, cooled to rt and diluted with water (10 mL). The aqueous layer was extracted with CHCl<sub>3</sub> (3 × 25 mL) and the combined organic phases were dried over Na<sub>2</sub>SO<sub>4</sub> and concentrated. FC (SiO<sub>2</sub>, 0.1% NEt<sub>3</sub> in CH<sub>2</sub>Cl<sub>2</sub>) afforded the imine intermediate as a yellow solid, which was redissolved in THF (100 mL). A 2M aqueous HCl solution (50 mL) was added and after 1.5 h of stirring, the solution was made basic by addition of a saturated aqueous KHCO<sub>3</sub> solution (pH ~ 10). The mixture was extracted with EtOAc (3 × 50 mL) and the combined organic phases were dried over Na<sub>2</sub>SO<sub>4</sub> and concentrated. The product was precipitated in Et<sub>2</sub>O, filtered off and air-dried to afford (*E*)-**3** (503 mg, 78%) as a light-brown solid; m.p. 260 °C (decomp); <sup>1</sup>H NMR (400 MHz, DMSO-*d*<sub>6</sub>): 6.97 (d, *J* = 8.0 Hz, 2H; 2 arom. H), 6.87 (d, *J* = 2.0 Hz, 2H; 2 arom. H), 6.45 (dd, *J* = 8.0, 1.9 Hz, 2H; 2 arom. H), 4.89 (s, 4H; 2 NH<sub>2</sub>), 3.03-2.84 (m, br. 8H; 4 CH<sub>2</sub>); <sup>13</sup>C NMR (100 MHz, DMSO-*d*<sub>6</sub>): 147.2, 143.4, 134.7, 134.1, 124.7, 113.6, 109.8, 31.9, 29.5; HRMS (ESI) *m/z*: 263.1544 ([M + H]<sup>+</sup>, calcd for C<sub>18</sub>H<sub>19</sub>N<sub>2</sub><sup>+</sup>: 263.1543).

**(*Z*)-2,2',3,3'-tetrahydro-(1,1'-biindenylidene)-6,6'-diamine [(*Z*)-**3**]:**

Compound (*Z*)-**2** (735 mg, 1.88 mmol), palladium(II) acetate (34 mg, 0.15 mmol), DPPF (104 mg, 0.19 mmol) and sodium tert-butoxide (362 mg, 3.77 mmol) were brought under a N<sub>2</sub> atmosphere in a Schlenk tube via three vacuum/N<sub>2</sub> cycles. Then degassed toluene (9 mL) was added, followed by benzophenone imine (0.79 mL, 4.71 mmol). The mixture was stirred at 90

°C for 16 h, cooled to rt and diluted with water (10 mL). The aqueous layer was extracted with CH<sub>2</sub>Cl<sub>2</sub> (3 × 25 mL) and the combined organic phases were dried over Na<sub>2</sub>SO<sub>4</sub> and concentrated. FC (SiO<sub>2</sub>, 0.1% NEt<sub>3</sub> in CH<sub>2</sub>Cl<sub>2</sub>) afforded the imine intermediate as a yellow oil, which was redissolved in THF (20 mL). A 2M aqueous HCl solution (10 mL) was added and after 30 min of stirring, the mixture was diluted with water (10 mL) and extracted with Et<sub>2</sub>O (4 × 10 mL). The water layer was then made basic by addition of a saturated aqueous KHCO<sub>3</sub> solution (pH ~ 10) and extracted with EtOAc (3 × 25 mL). The combined extracts were dried over Na<sub>2</sub>SO<sub>4</sub> and concentrated to afford (*Z*)-**3** (332 mg, 67%) as a light-brown solid; m.p. 92.0 – 92.9 °C; <sup>1</sup>H NMR (400 MHz, DMSO-*d*<sub>6</sub>): 7.27 (d, *J* = 2.1 Hz, 2H; 2 arom. H), 6.96 (d, *J* = 8.0 Hz, 2H; 2 arom. H), 6.45 (dd, *J* = 8.0, 2.0 Hz, 2H; 2 arom. H), 4.84 (s, 4H; 2 NH<sub>2</sub>), 2.78-2.64 (m, br. 8H; 4 CH<sub>2</sub>); <sup>13</sup>C NMR (100 MHz, DMSO-*d*<sub>6</sub>): 146.5, 140.5, 135.7, 134.6, 125.0, 114.2, 109.1, 34.8, 29.0; HRMS (ESI) *m/z*: 263.1543 ([M +H]<sup>+</sup>, calcd for C<sub>18</sub>H<sub>19</sub>N<sub>2</sub><sup>+</sup>: 263.1543).

**(*E*)-1,1'-(2,2',3,3'-tetrahydro-(1,1'-biindenylidene)-6,6'-diyl)bis(3-phenylurea) [(*E*)-1]:**

Phenyl isocyanate (66 μL, 0.60 mmol) was added to compound (*E*)-**3** (72 mg, 0.27 mmol) in CH<sub>2</sub>Cl<sub>2</sub> (40 mL) under a N<sub>2</sub> atmosphere. The mixture was stirred at reflux for 3 d, after which the white precipitate was filtered off. The product was recrystallized from DMSO, washed vigorously with CH<sub>2</sub>Cl<sub>2</sub> and air-dried to afford (*E*)-**1** (78 mg, 57%) as a beige solid; m.p. 260 °C (dec); <sup>1</sup>H NMR (400 MHz, DMSO-*d*<sub>6</sub>): 8.71 (s, 2H; 2 NH), 8.63 (s, 2H; 2 NH), 7.89 (s, 2H; 2 arom. H), 7.46 (d, *J* = 8.0 Hz, 4H; 4 arom. H), 7.31-7.20 (m, 8H; 8 arom. H), 6.97 (t, *J* = 7.4 Hz, 2H; 2 arom. H), 3.15-3.01 (m, br. 8H; 4 CH<sub>2</sub>); too insoluble for a <sup>13</sup>C NMR measurement; HRMS (ESI) *m/z*: 501.2275 ([M +H]<sup>+</sup>, calcd for C<sub>32</sub>H<sub>29</sub>N<sub>4</sub>O<sub>2</sub><sup>+</sup>: 501.2285).

**(*Z*)-1,1'-(2,2',3,3'-tetrahydro-(1,1'-biindenylidene)-6,6'-diyl)bis(3-phenylurea) [(*Z*)-1]:**

Phenyl isocyanate (86 μL, 0.79 mmol) was added to compound (*Z*)-**3** (103 mg, 0.39 mmol) in CH<sub>2</sub>Cl<sub>2</sub> (5 mL) under a N<sub>2</sub> atmosphere. The solution was stirred for 16 h, after which the white precipitate was filtered off and air-dried to afford (*Z*)-**1** (137 mg, 70%) as a white solid; m.p. 340 °C (dec); <sup>1</sup>H NMR (400 MHz, DMSO-*d*<sub>6</sub>): 8.74 (s, 2H; 2 NH), 8.50 (s, 2H; 2 NH), 8.11 (d, *J* = 2.1 Hz, 2H; 2 arom. H), 7.46-7.40 (m, 6H; 6 arom. H), 7.23 (d, *J* = 8.2 Hz, 2H; 2 arom. H), 7.10 (t, *J* = 7.8 Hz, 4H; 4 arom. H), 6.83 (t, *J* = 7.4 Hz, 2H; 2 arom. H), 2.93-2.75 (m, br. 8H; 4 CH<sub>2</sub>); <sup>13</sup>C NMR (100 MHz, DMSO-*d*<sub>6</sub>): 152.6, 141.3, 140.1, 139.8, 137.5, 134.8, 128.6, 125.1, 121.5, 118.1, 117.7, 113.6, 34.4, 29.4; HRMS (ESI) *m/z*: 501.2275 ([M +H]<sup>+</sup>, calcd for C<sub>32</sub>H<sub>29</sub>N<sub>4</sub>O<sub>2</sub><sup>+</sup>: 501.2285); elemental analysis calcd (%) for C<sub>32</sub>H<sub>28</sub>N<sub>4</sub>O<sub>2</sub>·<sup>2</sup>/<sub>5</sub>C<sub>2</sub>H<sub>6</sub>SO: C 74.07, H 5.76, N 10.53; found: C 74.01, H 5.77, N 10.51.

# $^1\text{H}$ and $^{13}\text{C}$ NMR Spectra of new compounds

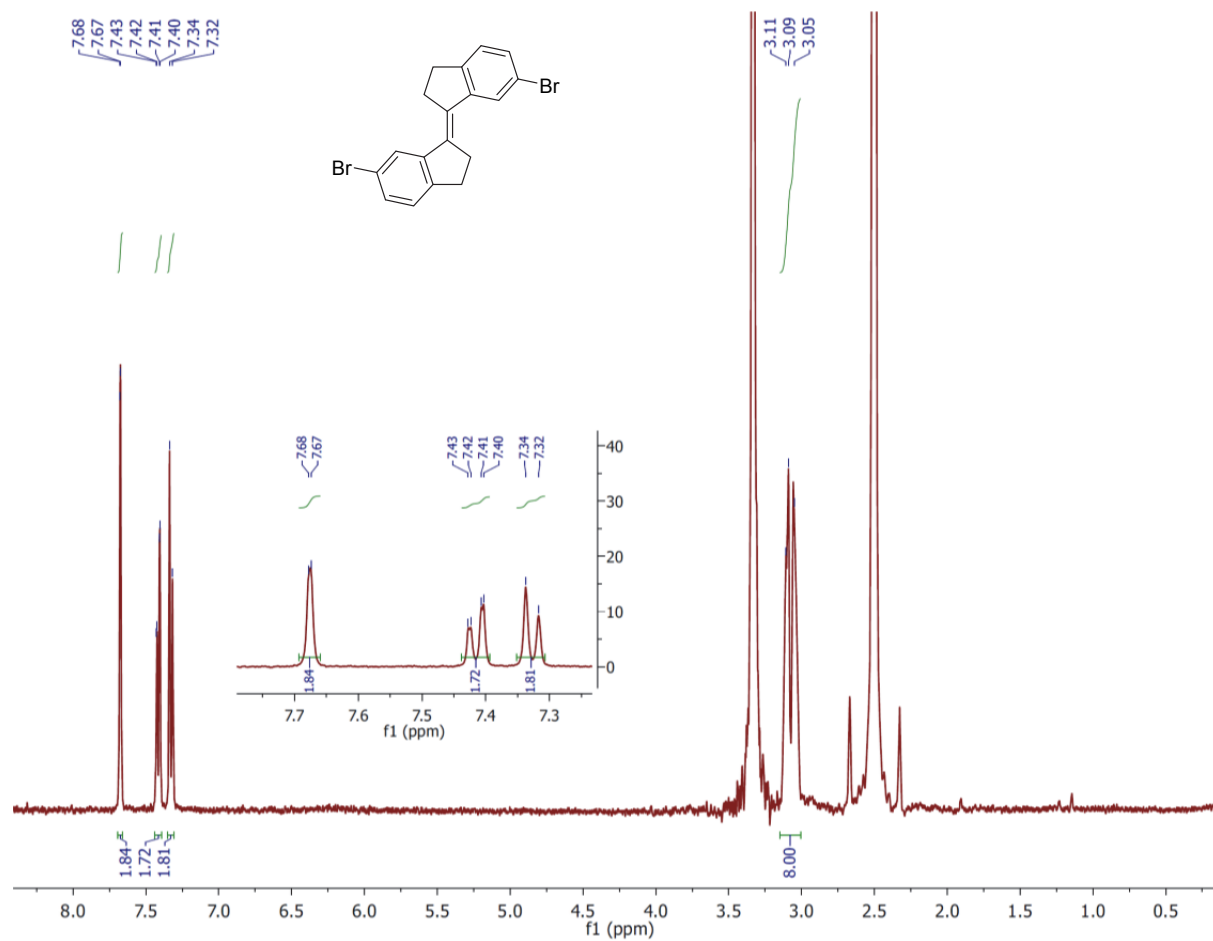

**Figure S1.** 400 MHz  $^1\text{H}$  NMR spectrum of *(E)*-2 measured at 298 K in  $\text{DMSO-}d_6$ .

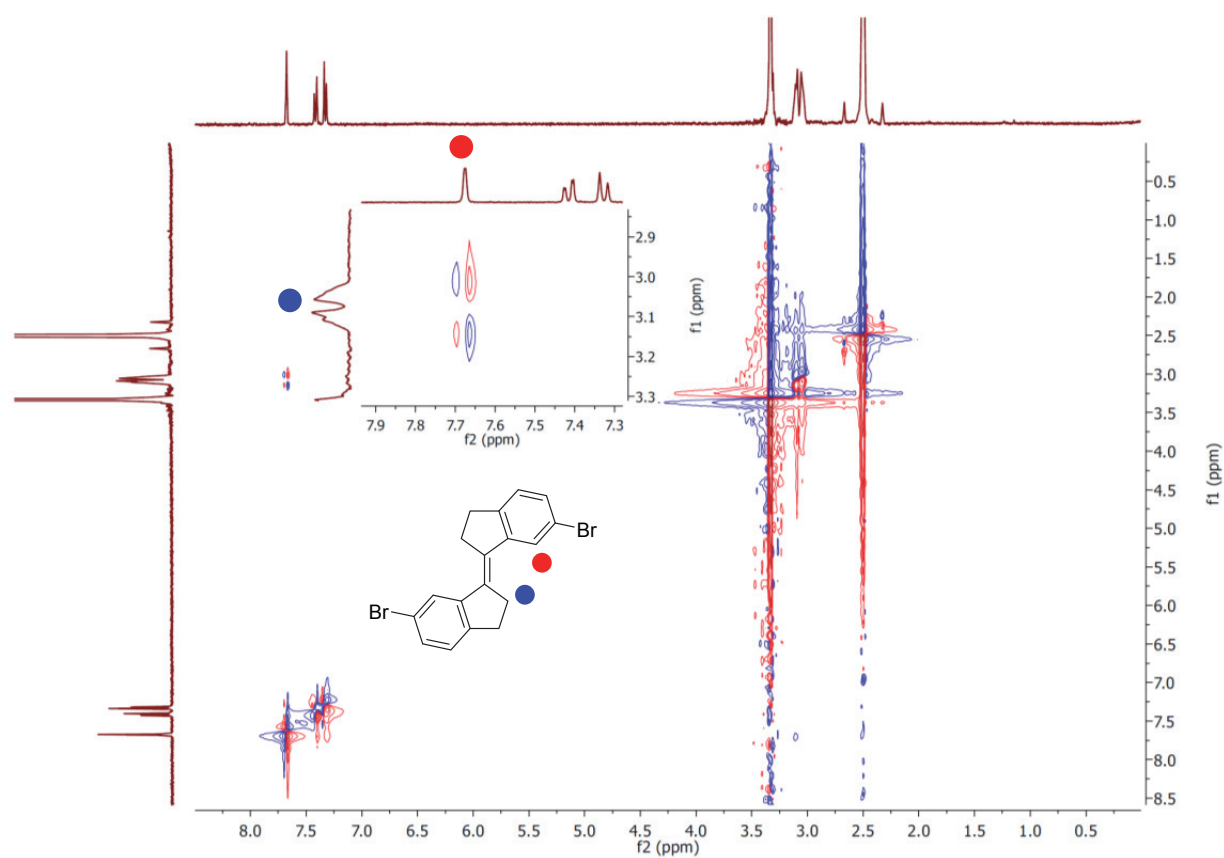

**Figure S2.** NOESY NMR spectrum of *(E)*-2 measured at 298 K in DMSO-*d*<sub>6</sub>.

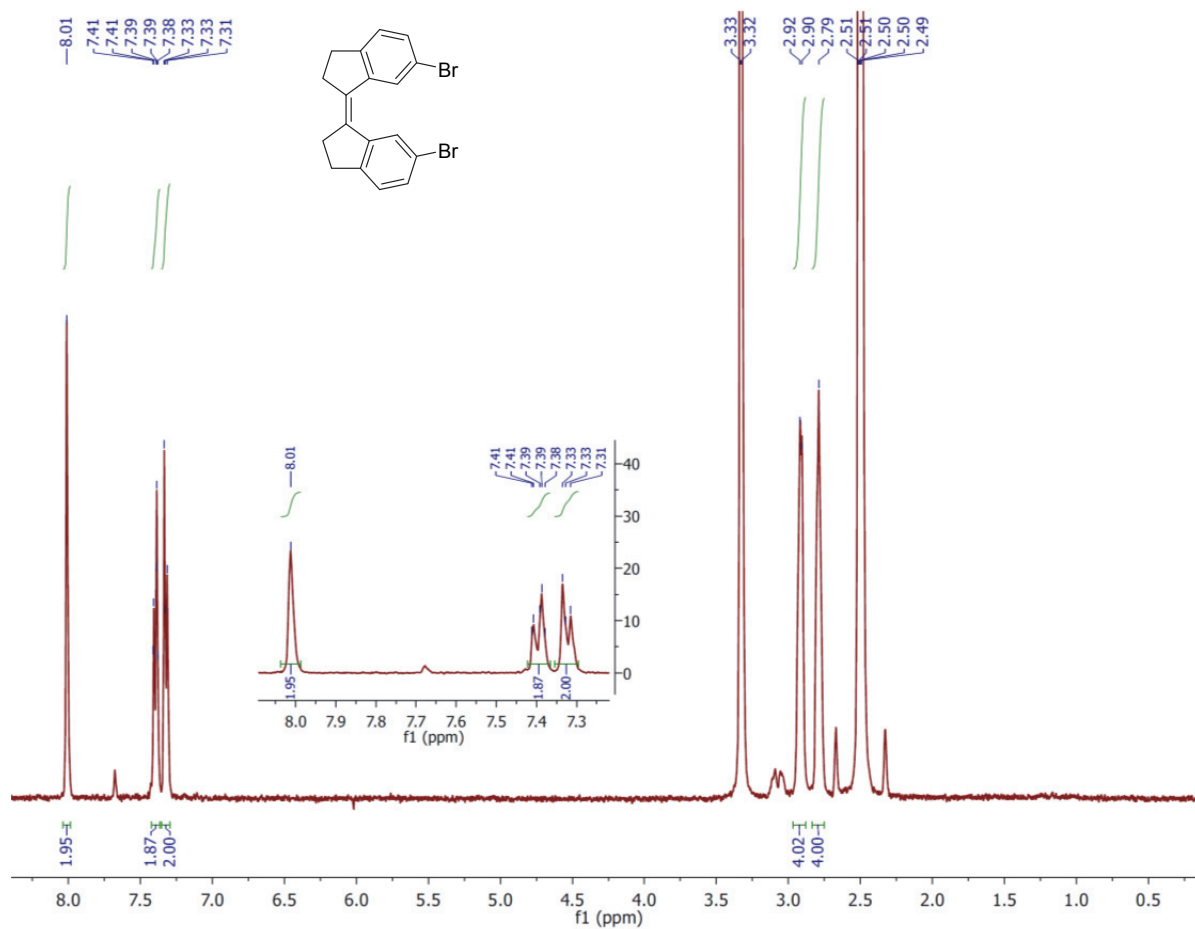

**Figure S3.** 400 MHz  $^1\text{H}$  NMR spectrum of (Z)-2 measured at 298 K in  $\text{DMSO-}d_6$ .

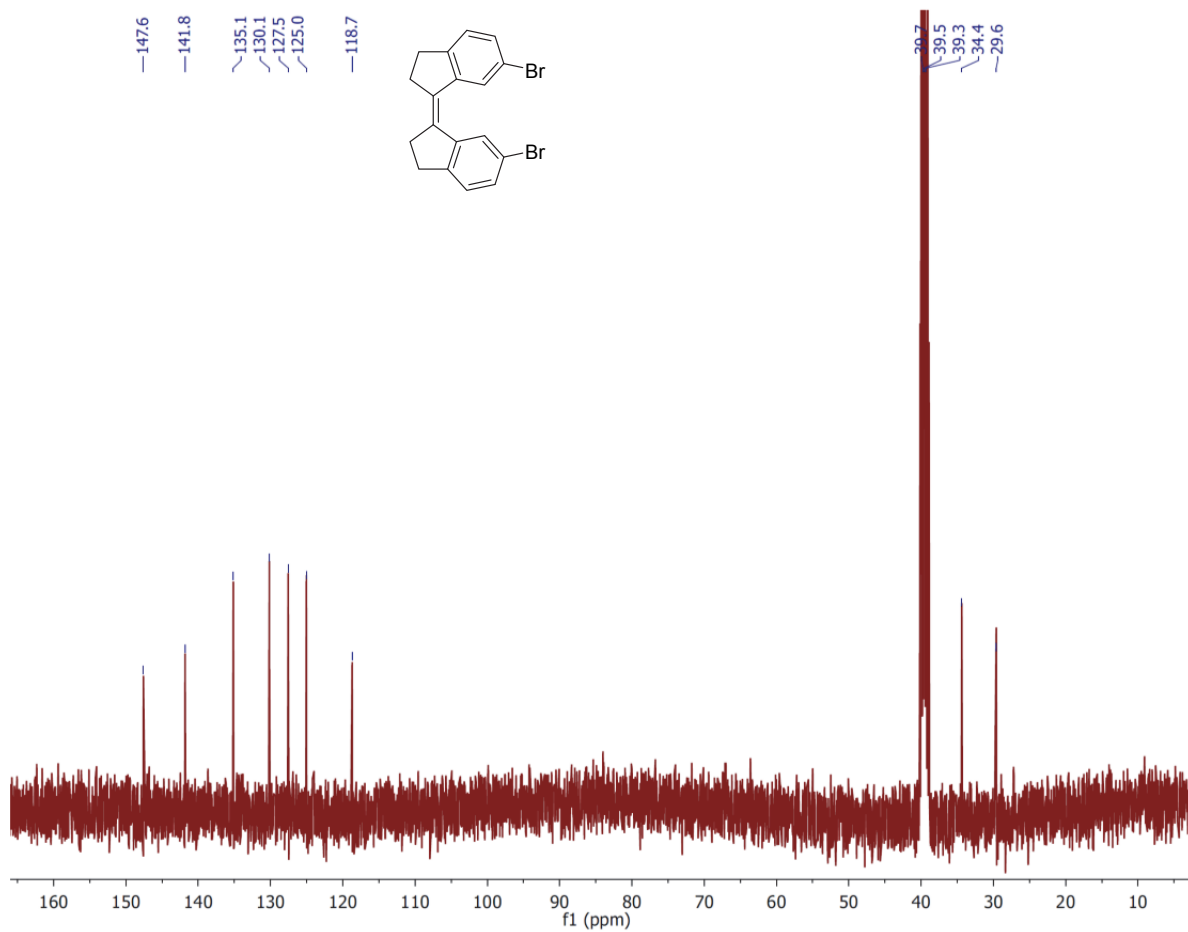

**Figure S4.** 100 MHz  $^{13}\text{C}$  NMR spectrum of (Z)-2 measured at 298 K in  $\text{DMSO-}d_6$ .



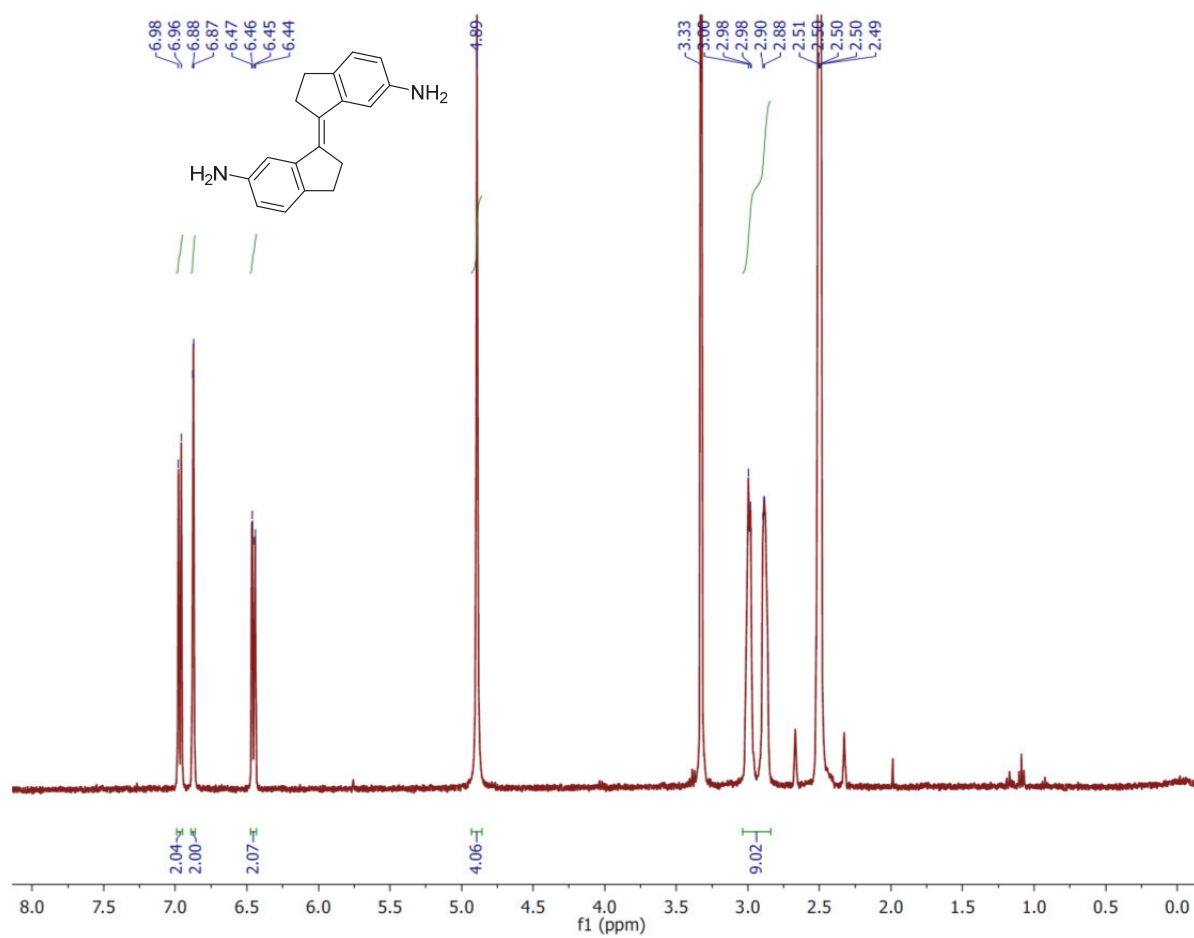

**Figure S5.** 400 MHz <sup>1</sup>H NMR spectrum of (*E*)-**3** measured at 298 K in DMSO-*d*<sub>6</sub>.

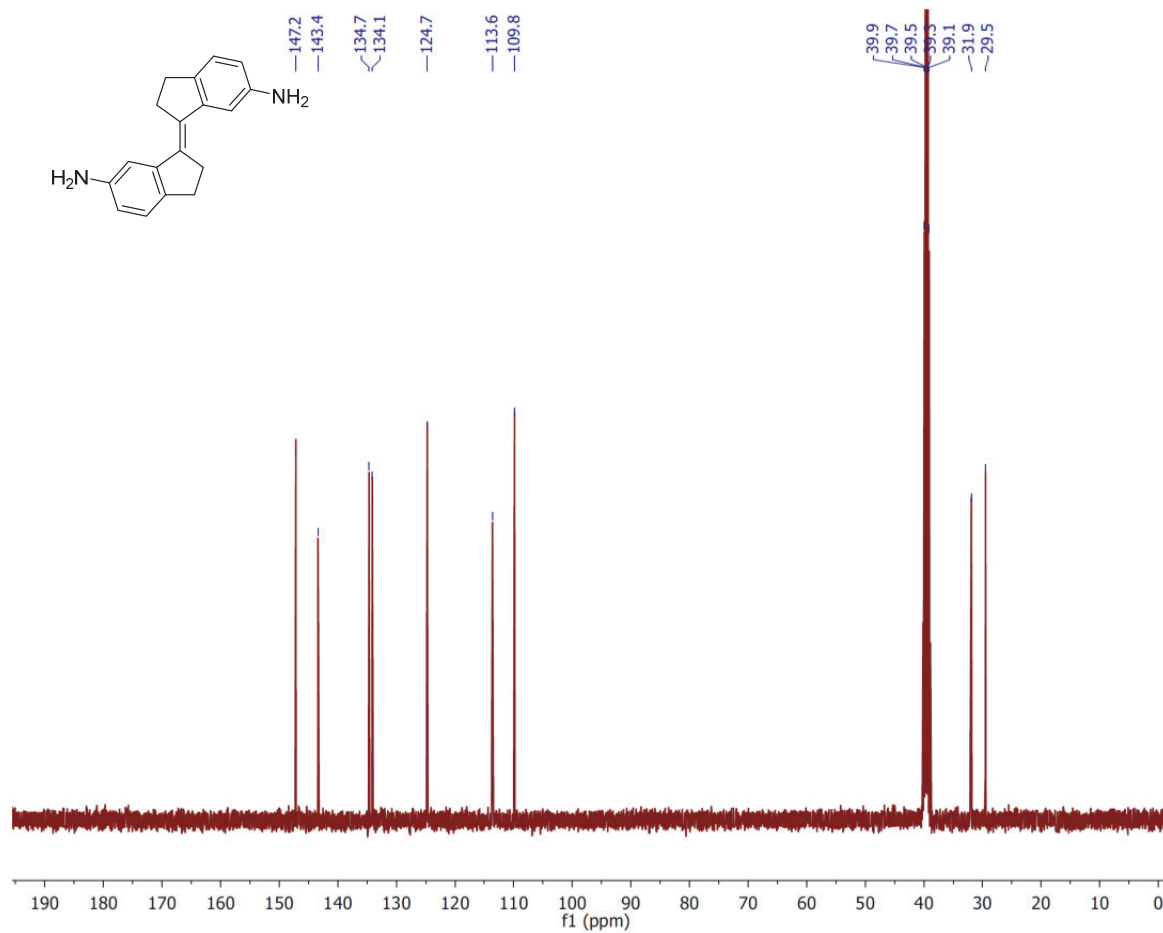

**Figure S6.** 100 MHz <sup>13</sup>C NMR spectrum of (*E*)-**3** measured at 298 K in DMSO-*d*<sub>6</sub>.

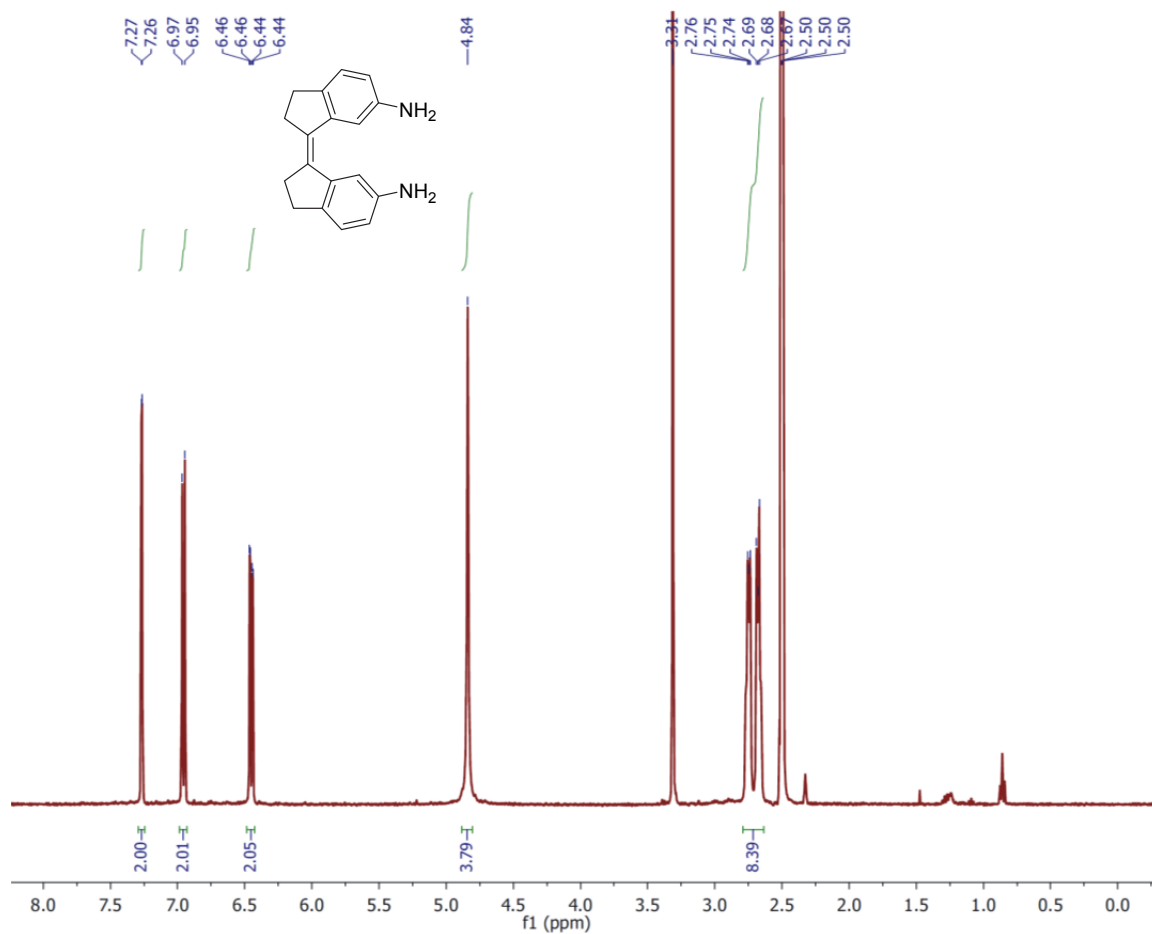

**Figure S7.** 400 MHz  $^1\text{H}$  NMR spectrum of (Z)-3 measured at 298 K in  $\text{DMSO-}d_6$ .

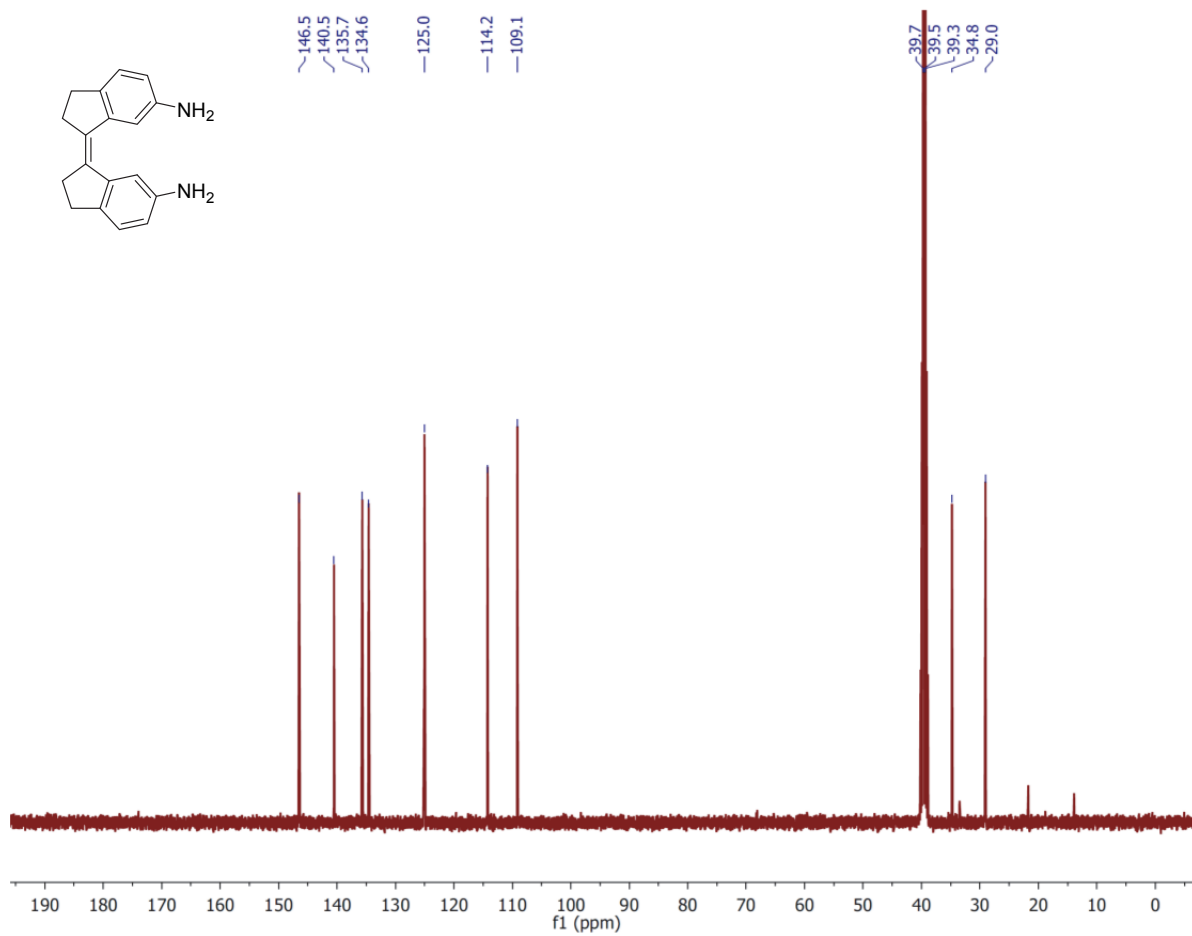

**Figure S8.** 100 MHz <sup>13</sup>C NMR spectrum of (Z)-**3** measured at 298 K in DMSO-*d*<sub>6</sub>.

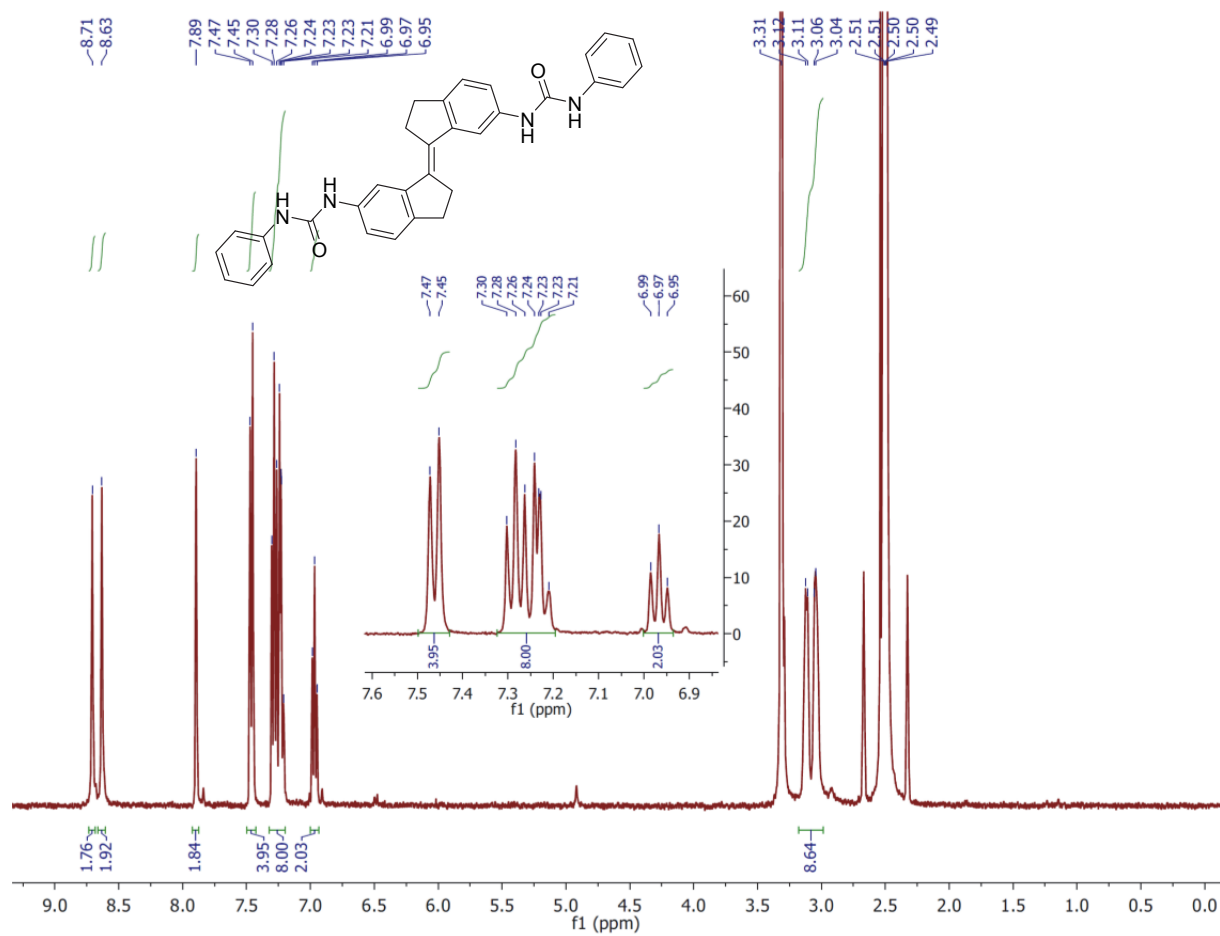

**Figure S9.** 400 MHz  $^1\text{H}$  NMR spectrum of (*E*)-1 measured at 298 K in  $\text{DMSO-}d_6$ .

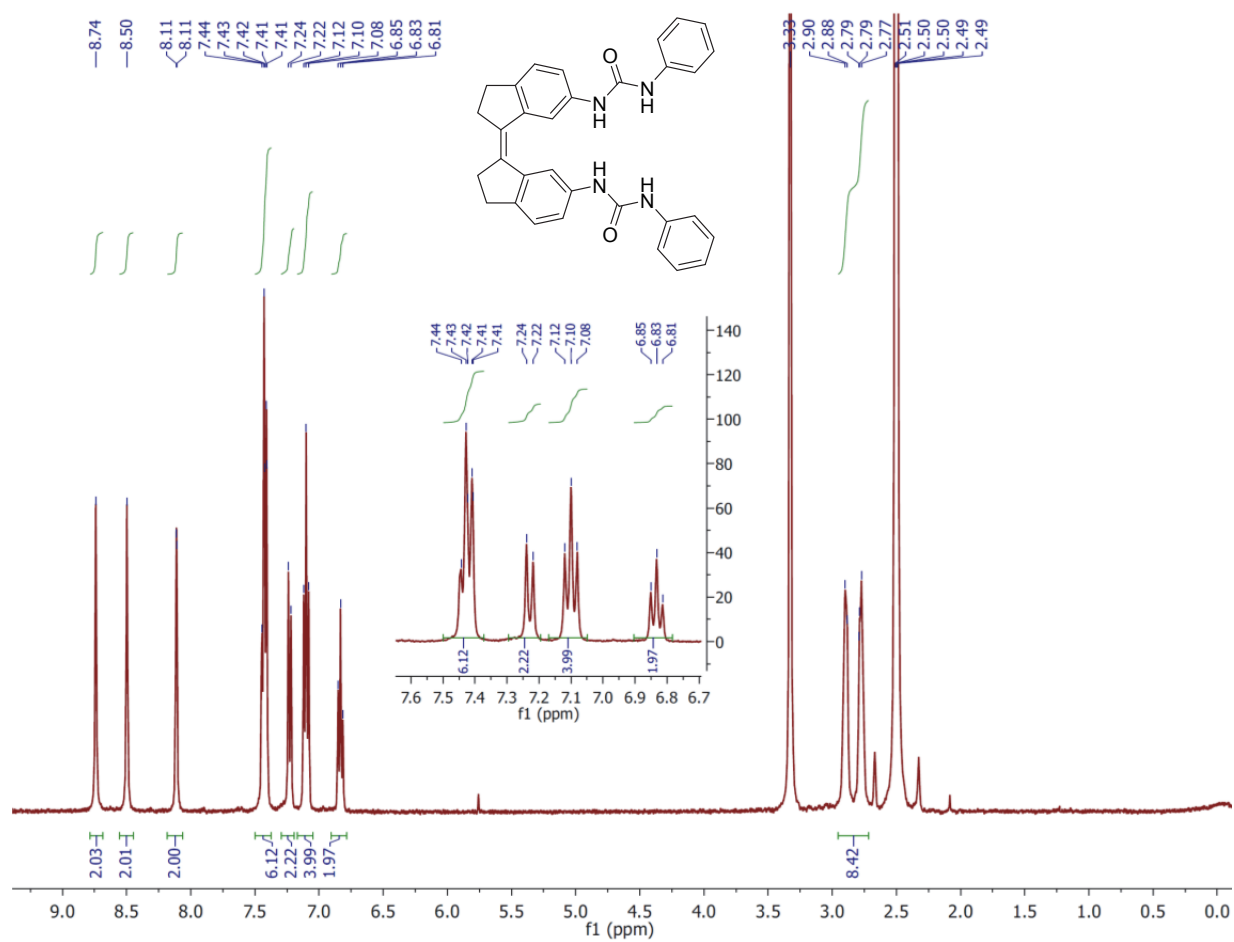

**Figure S10.** 400 MHz <sup>1</sup>H NMR spectrum of (Z)-1 measured at 298 K in DMSO-*d*<sub>6</sub>.

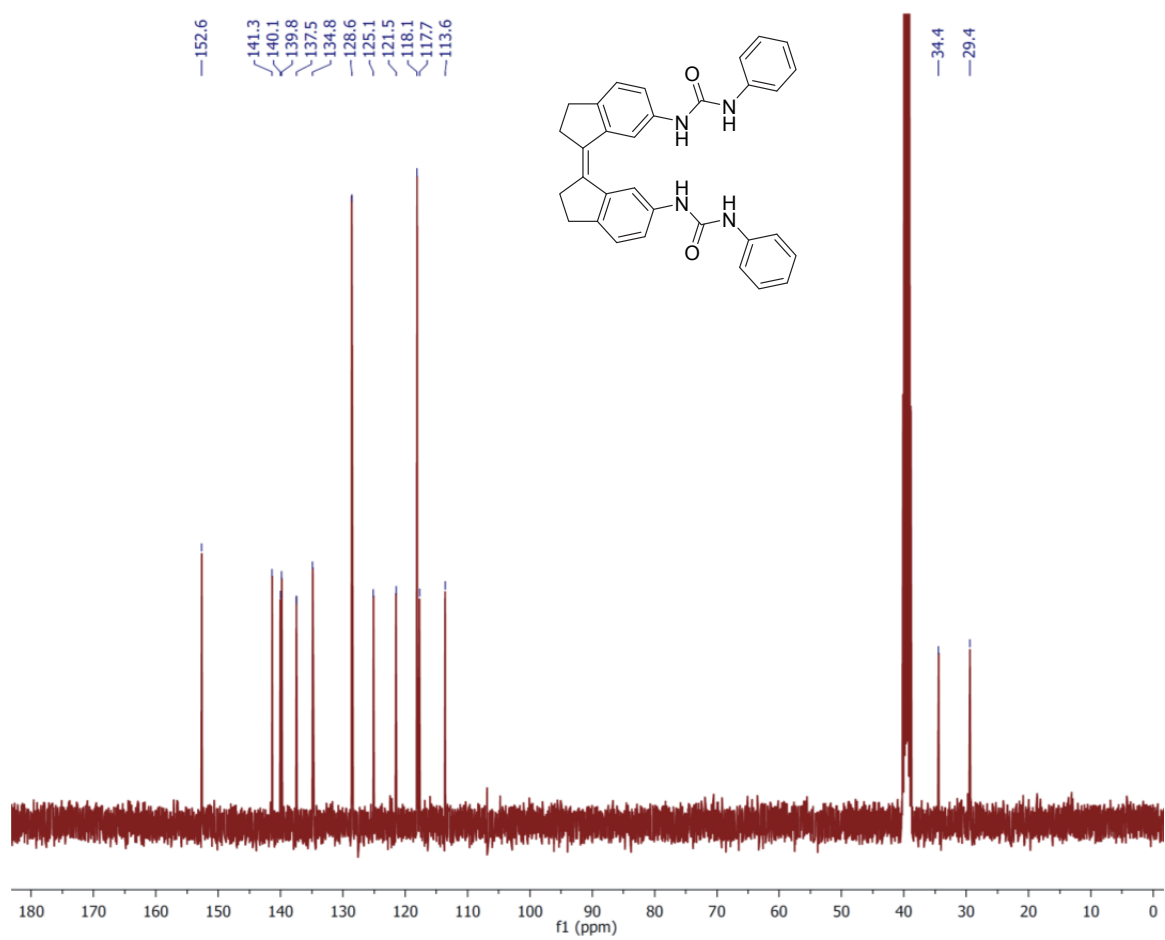

**Figure S11.** 100 MHz <sup>13</sup>C NMR spectrum of (Z)-1 measured at 298 K in DMSO-*d*<sub>6</sub>.

## $^1\text{H}$ NMR photoisomerization studies

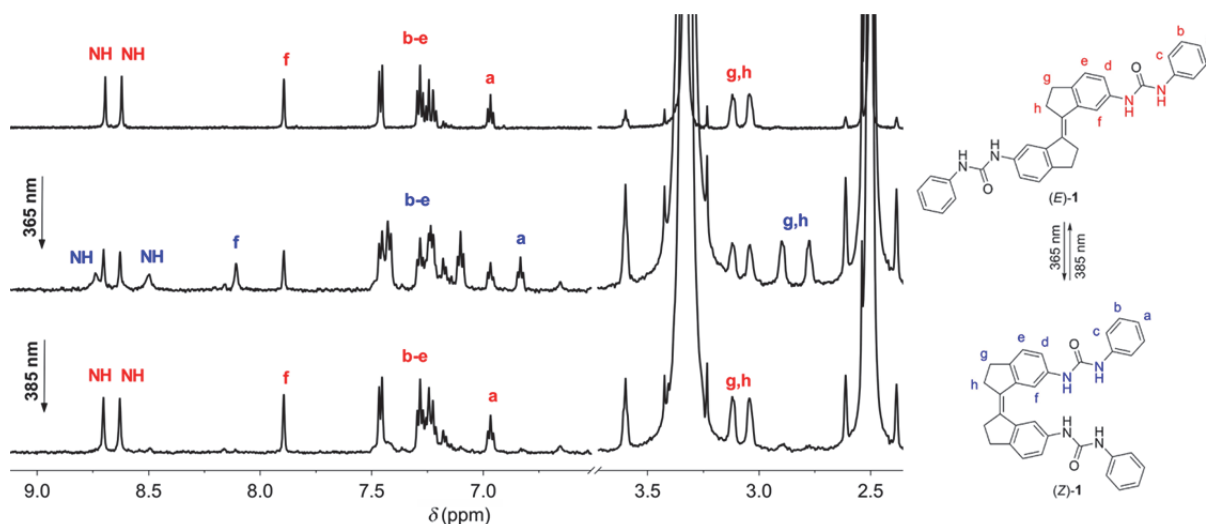

**Figure S12.** Aromatic and aliphatic region in the  $^1\text{H}$  NMR spectrum (600 MHz, 293 K) of (*E*)-**1** in degassed  $\text{DMSO-}d_6$  ( $2.5 \times 10^{-4}$  M) (top) and spectral changes after irradiation with 365 nm light for 1 h (middle) followed by irradiation with 385 nm light for 1 h (bottom) at 20 °C. For determination of the PSS ratios, the integrals of the NH,  $\text{H}_a$  and  $\text{H}_f$  signals were averaged giving a  $\text{PSS}_{365}$  ratio (*E/Z*) of 49:51 and a  $\text{PSS}_{385}$  ratio (*E/Z*) of 93:7.

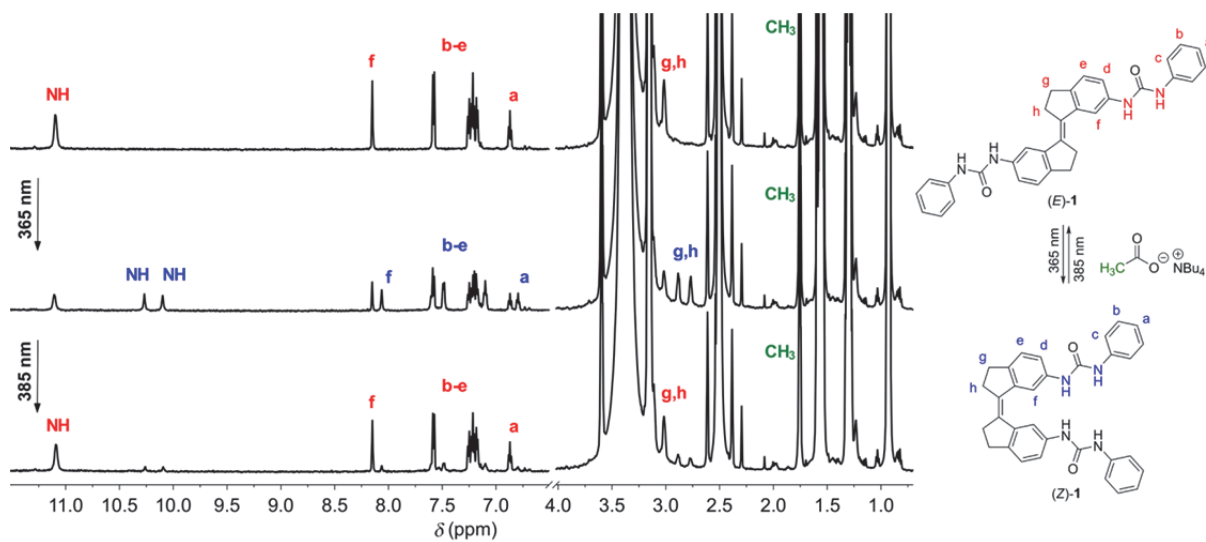

**Figure S13.** Aromatic and aliphatic region in the  $^1\text{H}$  NMR spectrum (600 MHz, 293 K) of a mixture of (*E*)-**1** ( $2.5 \times 10^{-4}$  M) and  $[\text{Bu}_4\text{N}]^+[\text{CH}_3\text{CO}_2]^-$  ( $2.5 \times 10^{-3}$  M) in degassed  $\text{DMSO-}d_6/0.5\%$   $\text{H}_2\text{O}$  (top) and spectral changes after irradiation with 365 nm light for 1 h (middle) followed by irradiation with 385 nm light for 1 h (bottom) at 20 °C. For determination of the PSS ratios, the integrals of the NH,  $\text{H}_a$  and  $\text{H}_f$  signals were averaged giving a  $\text{PSS}_{365}$  ratio (*E/Z*) of 48:52 and a  $\text{PSS}_{385}$  ratio (*E/Z*) of 88:12.



## Quantum yield determination

The photon flux of the Thorlab model F365F1 high-power LED ( $\lambda_{\max} = 365$  nm) was estimated by measuring the production of ferrous ions from potassium ferrioxalate.<sup>2</sup> The rate ( $r$ ) of  $\text{Fe}^{2+}$  ion formation was:  $8.81 \times 10^{-7} \text{ M s}^{-1}$ . Hence, the moles of photons absorbed per time unit ( $Nh\nu/t = \text{moles of Fe}^{2+}/\phi t$ ) in a 2 mL solution can be calculated using the reported quantum yield of ferrioxalate ( $\phi = 1.21$ ),<sup>3</sup> which gives:  $1.46 \times 10^{-9} \text{ mol s}^{-1}$ .

A solution of (*E*)-**1** in DMSO ( $1 \times 10^{-4} \text{ M}$ ) in a 1 cm quartz cuvette was irradiated at 20 °C with the Thorlab model F365F1 high-power LED. The concentration was high enough to absorb all incident light ( $\text{Abs}_{365} \geq 2$ ). The absorbance increase at  $\lambda = 380$  nm was monitored over time by UV-vis spectroscopy and the molar absorptivities at this wavelength ( $\epsilon_E = 2468.4 \text{ M}^{-1} \text{ cm}^{-1}$ ,  $\epsilon_Z = 7365.5 \text{ M}^{-1} \text{ cm}^{-1}$ ) were used to calculate the concentration of (*Z*)-**1**. The slopes of the plots of the concentration increase versus time (Figure S12), at low conversion, represent the rate of formation ( $r$ ). These were obtained by linear fitting to the equation  $y = ax + b$  using Origin software. The photochemical quantum yield was obtained by comparison of the rate of formation of (*Z*)-**1** ( $r = 3.64 \times 10^{-8} \text{ M s}^{-1}$ ) with the rate of  $\text{Fe}^{2+}$  formation from potassium ferrioxalate giving  $\phi_{Z \rightarrow E} = 5.0 \pm 0.15\%$ . The quantum yield for the ‘backward’ reaction is defined as:  $\phi_{Z \rightarrow E} = \phi_{E \rightarrow Z} \epsilon_E n_E / \epsilon_Z n_Z$ , where  $\epsilon_E, \epsilon_Z$  are the molar absorptivities at  $\lambda = 365$  nm ( $\epsilon_E = 27945 \text{ M}^{-1} \text{ cm}^{-1}$ ,  $\epsilon_Z = 16834 \text{ M}^{-1} \text{ cm}^{-1}$ ) and  $n_E, n_Z$  are the amount of (*E*)-**1** and (*Z*)-**1** at the photostationary state ( $\text{PSS}_{365} E/Z = 49:51$ ), giving  $\phi_{Z \rightarrow E} = 8.0 \pm 0.23\%$ .

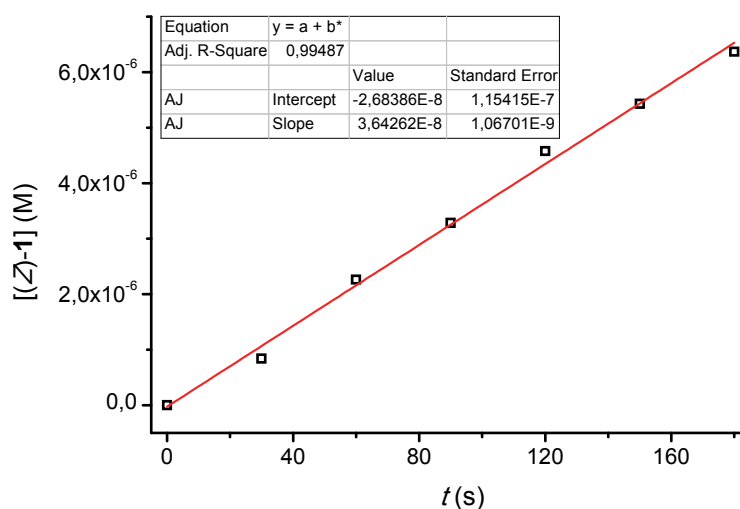

**Figure S14.** Concentration of (*Z*)-**1** as a function of time during  $\lambda = 365$  nm irradiation of a  $1 \times 10^{-4} \text{ M}$  solution (2 mL) obtained by measuring the absorbance increase at  $\lambda = 380$  nm.

## <sup>1</sup>H NMR titration experiments

First, 5 mM solutions of receptors (*E*)-**1** and (*Z*)-**1** were prepared in DMSO-*d*<sub>6</sub>/0.5%*H*<sub>2</sub>O (v/v). The tetrabutylammonium anion was dissolved in the receptor solution and was present at a 50 mM concentration. The 50 mM anion solution was added stepwise to 0.5 mL of the 5 mM receptor solution and a <sup>1</sup>H NMR spectrum (400 MHz) was recorded after each addition.

### Addition of [Bu<sub>4</sub>N]<sup>+</sup>[Cl]<sup>-</sup> to (*Z*)-**1**:

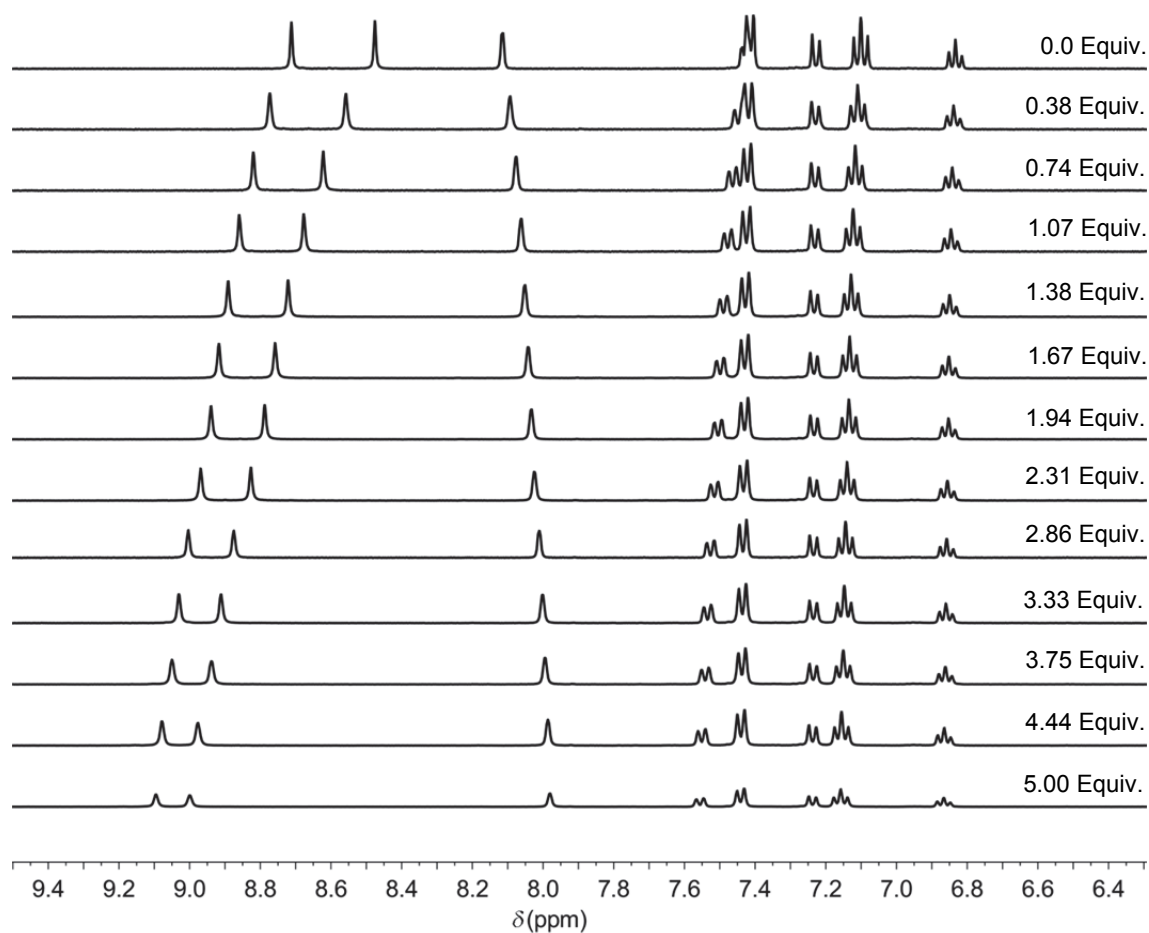

**Figure S15.** <sup>1</sup>H NMR spectral changes (400 MHz, 293 K) in the aromatic region of (*Z*)-**1** ( $5 \times 10^{-3}$  M in DMSO-*d*<sub>6</sub>/0.5%*H*<sub>2</sub>O) upon the stepwise addition of [Bu<sub>4</sub>N]<sup>+</sup>[Cl]<sup>-</sup> (from top to bottom: 0.0, 0.38, 0.74, 1.07, 1.38, 1.67, 1.94, 2.31, 2.86, 3.33, 3.75, 4.44, 5.00 equivalents).

**Addition of  $[\text{Bu}_4\text{N}]^+[\text{Br}]^-$  to (Z)-1:**

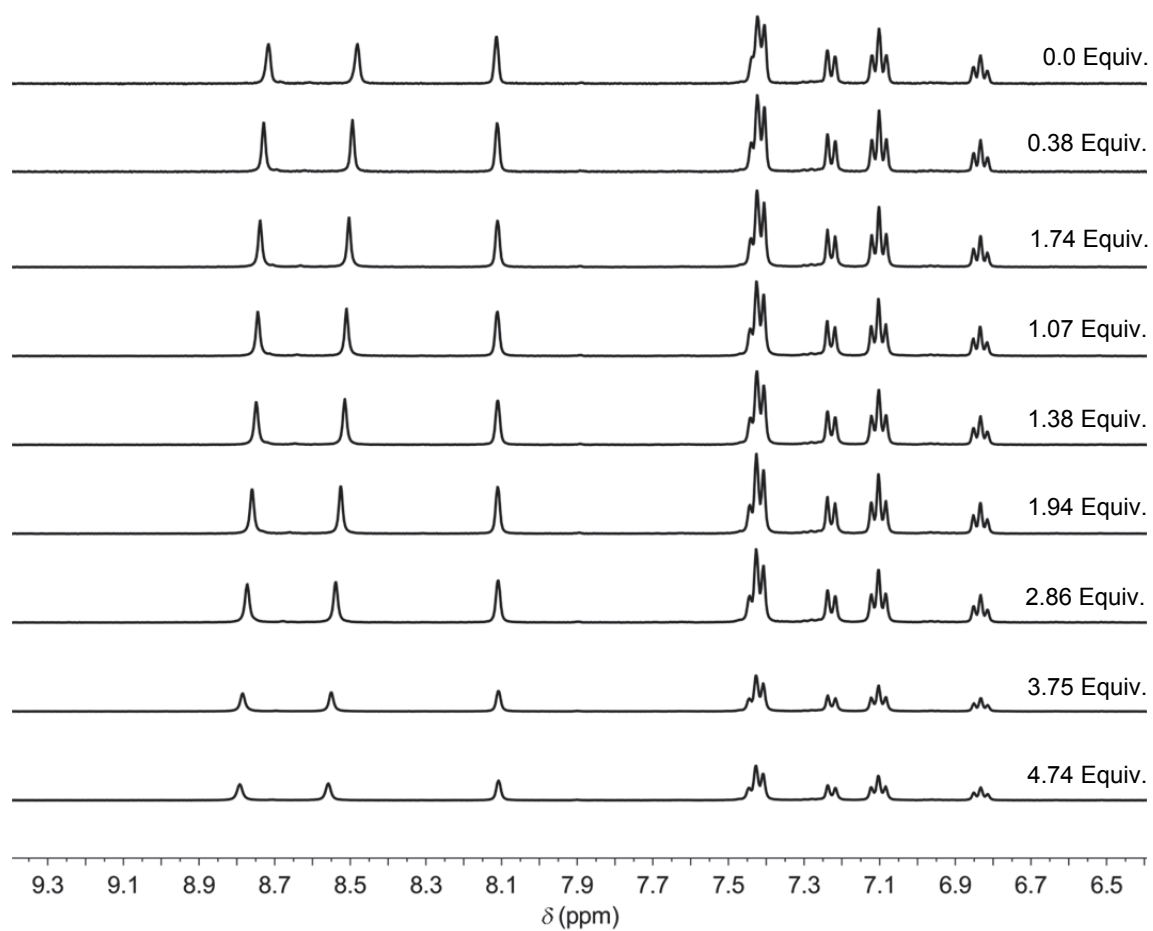

**Figure S16.**  $^1\text{H}$  NMR spectral changes (400 MHz, 293 K) in the aromatic region of (Z)-1 ( $5 \times 10^{-3}$  M in  $\text{DMSO-}d_6/0.5\%\text{H}_2\text{O}$ ) upon the stepwise addition of  $[\text{Bu}_4\text{N}]^+[\text{Br}]^-$  (from top to bottom: 0.0, 0.38, 0.74, 1.07, 1.38, 1.94, 2.86, 3.75, 4.74 equivalents).

**Addition of  $[\text{Bu}_4\text{N}]^+[\text{NO}_3]^-$  to (Z)-1:**

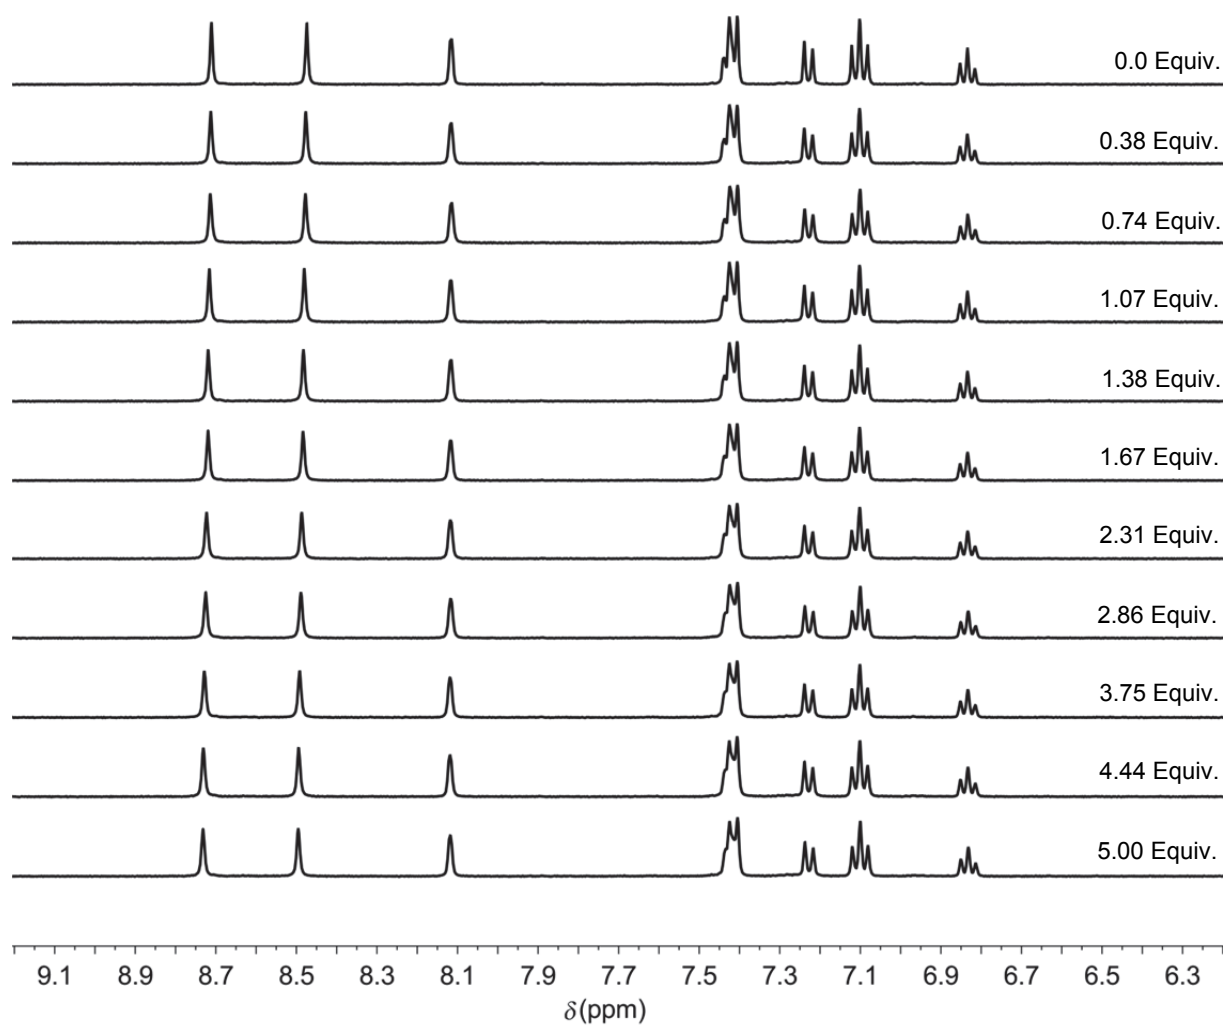

**Figure S17.**  $^1\text{H}$  NMR spectral changes (400 MHz, 293 K) in the aromatic region of (Z)-1 ( $5 \times 10^{-3}$  M in  $\text{DMSO}-d_6/0.5\% \text{H}_2\text{O}$ ) upon the stepwise addition of  $[\text{Bu}_4\text{N}]^+[\text{NO}_3]^-$  (from top to bottom: 0.0, 0.38, 0.74, 1.07, 1.38, 1.67, 2.31, 2.86, 3.75, 4.44, 5.00 equivalents).

**Addition of  $[\text{Bu}_4\text{N}]^+[\text{CH}_3\text{CO}_2]^-$  to (Z)-1:**

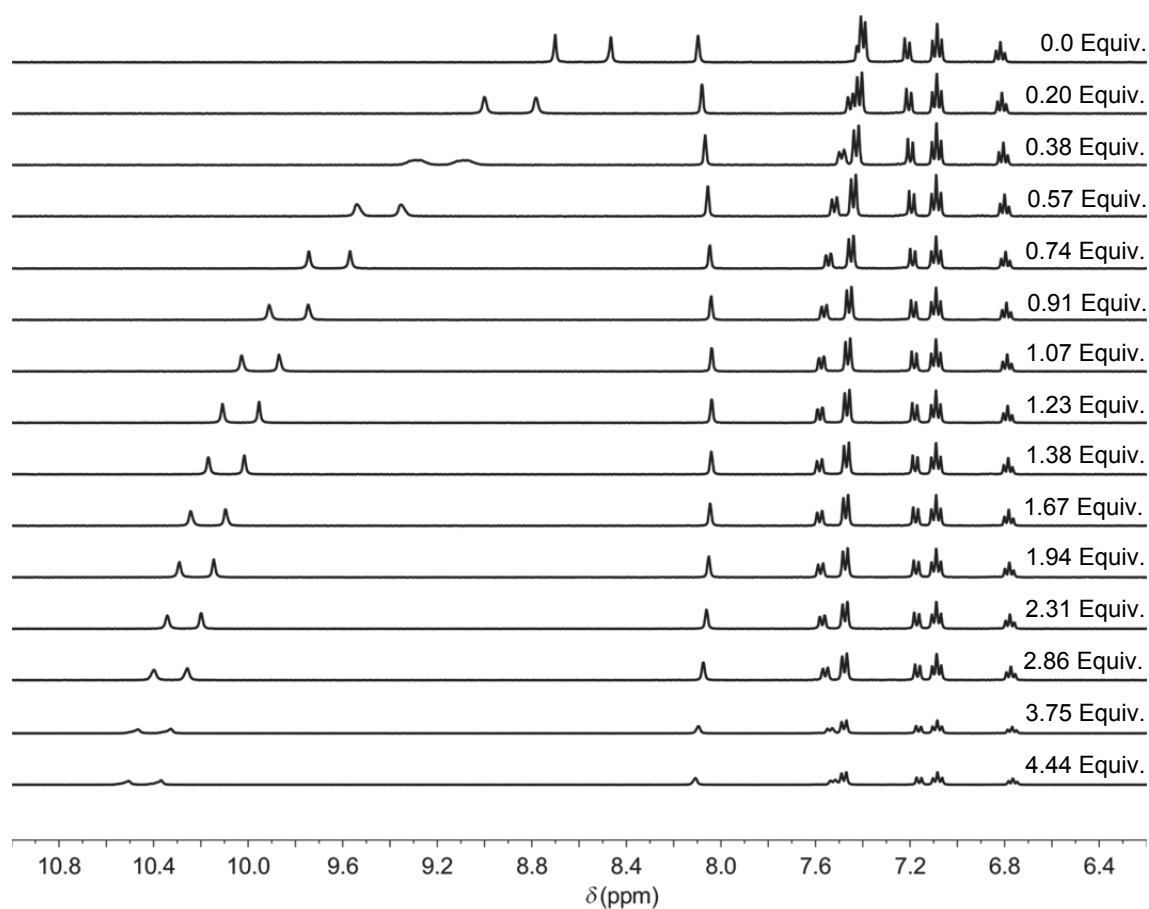

**Figure S18.**  $^1\text{H}$  NMR spectral changes (400 MHz, 293 K) in the aromatic region of (Z)-1 ( $5 \times 10^{-3}$  M in  $\text{DMSO-}d_6/0.5\% \text{H}_2\text{O}$ ) upon the stepwise addition of  $[\text{Bu}_4\text{N}]^+[\text{CH}_3\text{CO}_2]^-$  (from top to bottom: 0.0, 0.20, 0.38, 0.57, 0.74, 0.91, 1.07, 1.23, 1.38, 1.67, 1.94, 2.31, 2.86, 3.75, 4.44 equivalents).

**Addition of  $[\text{Bu}_4\text{N}]^+[\text{H}_2\text{PO}_4]^-$  to (Z)-1:**

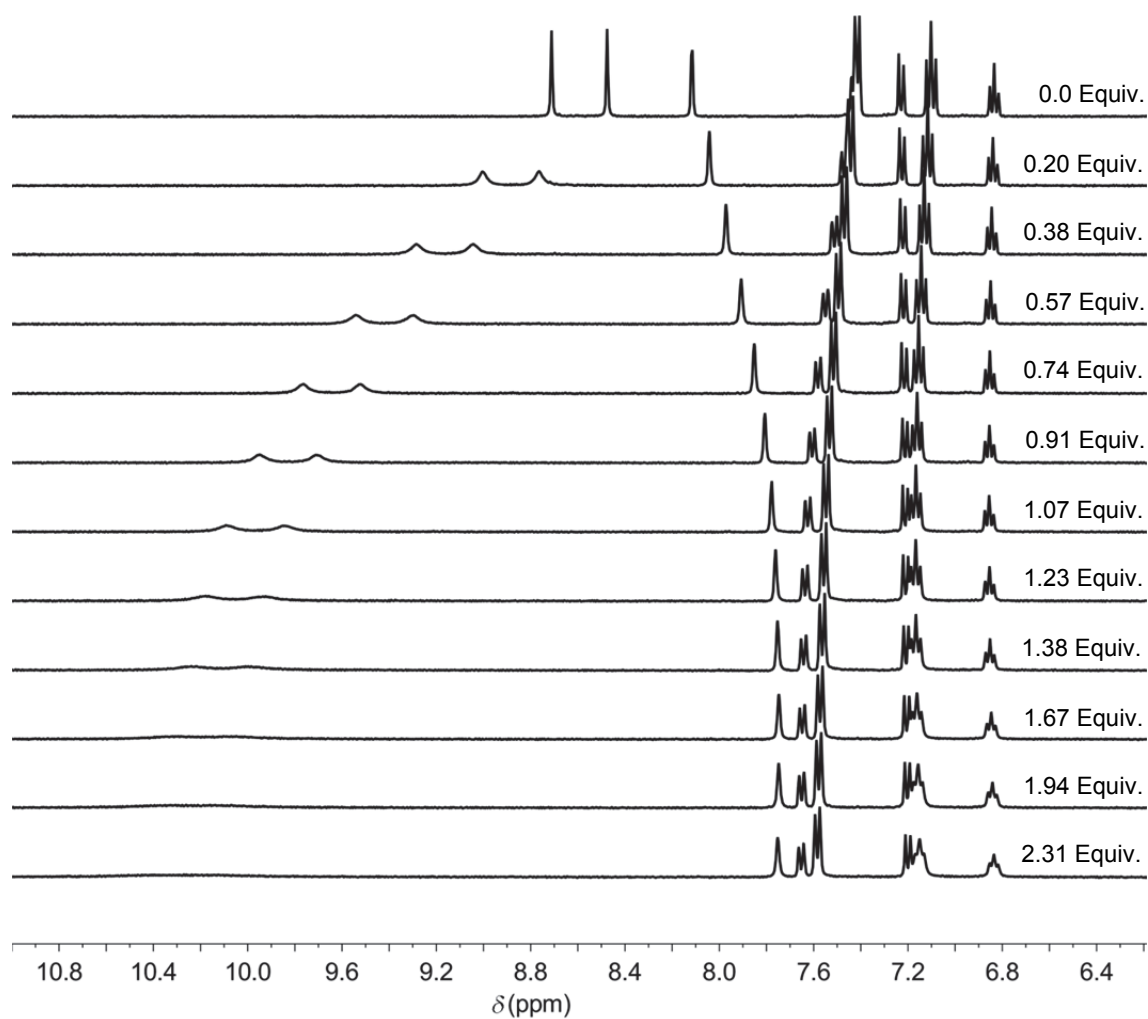

**Figure S19.**  $^1\text{H}$  NMR spectral changes (400 MHz, 293 K) in the aromatic region of (Z)-1 ( $5 \times 10^{-3}$  M in  $\text{DMSO}-d_6/0.5\% \text{H}_2\text{O}$ ) upon the stepwise addition of  $[\text{Bu}_4\text{N}]^+[\text{H}_2\text{PO}_4]^-$  (from top to bottom: 0.0, 0.20, 0.38, 0.57, 0.74, 0.91, 1.07, 1.23, 1.38, 1.67, 1.94, 2.31 equivalents).

**Addition of  $[\text{Bu}_4\text{N}]^+[\text{HSO}_4]^-$  to (Z)-1:**

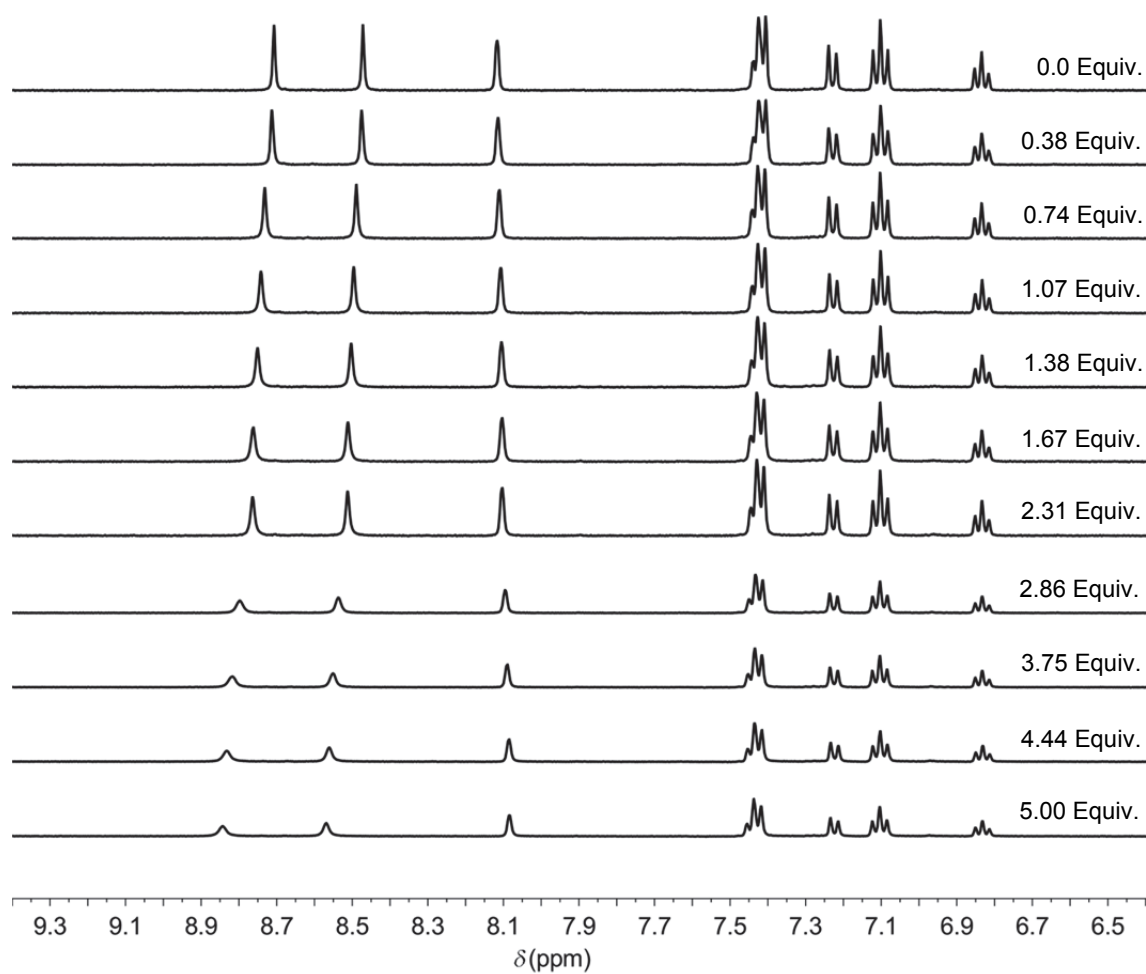

**Figure S20.**  $^1\text{H}$  NMR spectral changes (400 MHz, 293 K) in the aromatic region of (Z)-1 ( $5 \times 10^{-3}$  M in  $\text{DMSO}-d_6/0.5\% \text{H}_2\text{O}$ ) upon the stepwise addition of  $[\text{Bu}_4\text{N}]^+[\text{HSO}_4]^-$  (from top to bottom: 0.0, 0.38, 0.74, 1.07, 1.38, 1.67, 2.31, 2.68, 3.75, 4.44, 5.00 equivalents).

**Addition of  $[\text{Bu}_4\text{N}]^+[\text{Cl}]^-$  to (*E*)-1:**

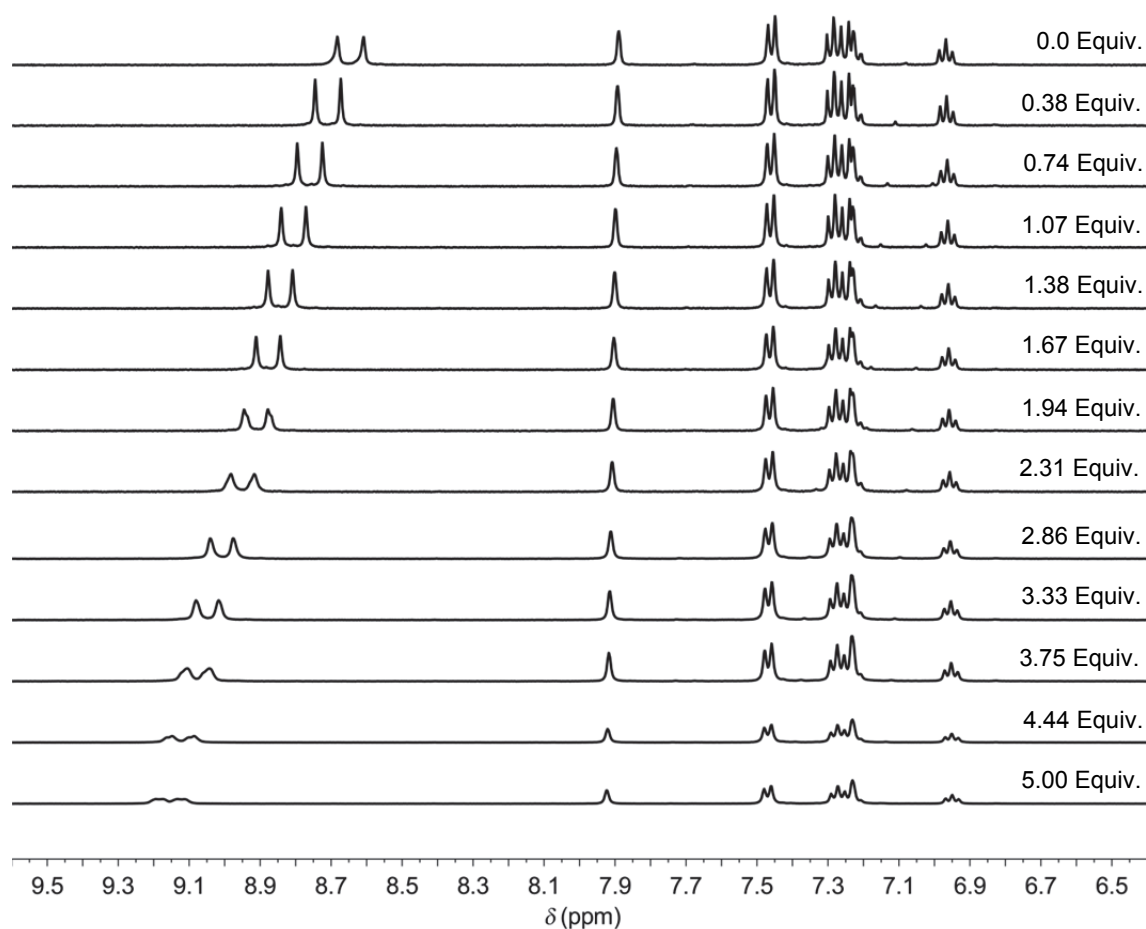

**Figure S21.**  $^1\text{H}$  NMR spectral changes (400 MHz, 293 K) in the aromatic region of (*E*)-1 ( $5 \times 10^{-3}$  M in  $\text{DMSO}-d_6/0.5\% \text{H}_2\text{O}$ ) upon the stepwise addition of  $[\text{Bu}_4\text{N}]^+[\text{Cl}]^-$  (from top to bottom: 0.0, 0.38, 0.74, 1.07, 1.38, 1.67, 1.94, 2.31, 2.86, 3.33, 3.75, 4.44, 5.00 equivalents).



**Addition of  $[\text{Bu}_4\text{N}]^+[\text{CH}_3\text{CO}_2]^-$  to (*E*)-1:**

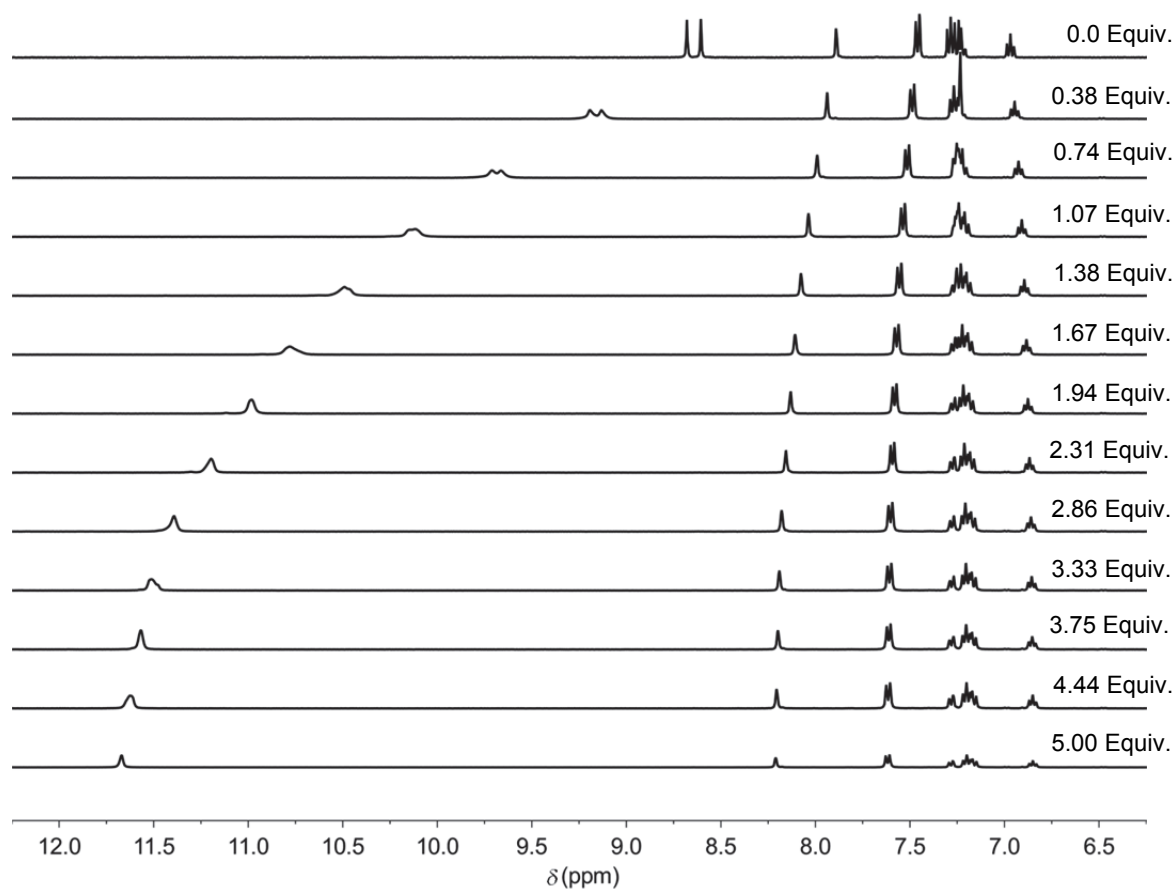

**Figure S22.**  $^1\text{H}$  NMR spectral changes (400 MHz, 293 K) in the aromatic region of (*E*)-1 ( $5 \times 10^{-3}$  M in  $\text{DMSO}-d_6/0.5\% \text{H}_2\text{O}$ ) upon the stepwise addition of  $[\text{Bu}_4\text{N}]^+[\text{CH}_3\text{CO}_2]^-$  (from top to bottom: 0.0, 0.38, 0.74, 1.07, 1.38, 1.67, 1.94, 2.31, 2.86, 3.33, 3.75, 4.44, 5.00 equivalents).

**Addition of  $[\text{Bu}_4\text{N}]^+[\text{H}_2\text{PO}_4]^-$  to (*E*)-1:**

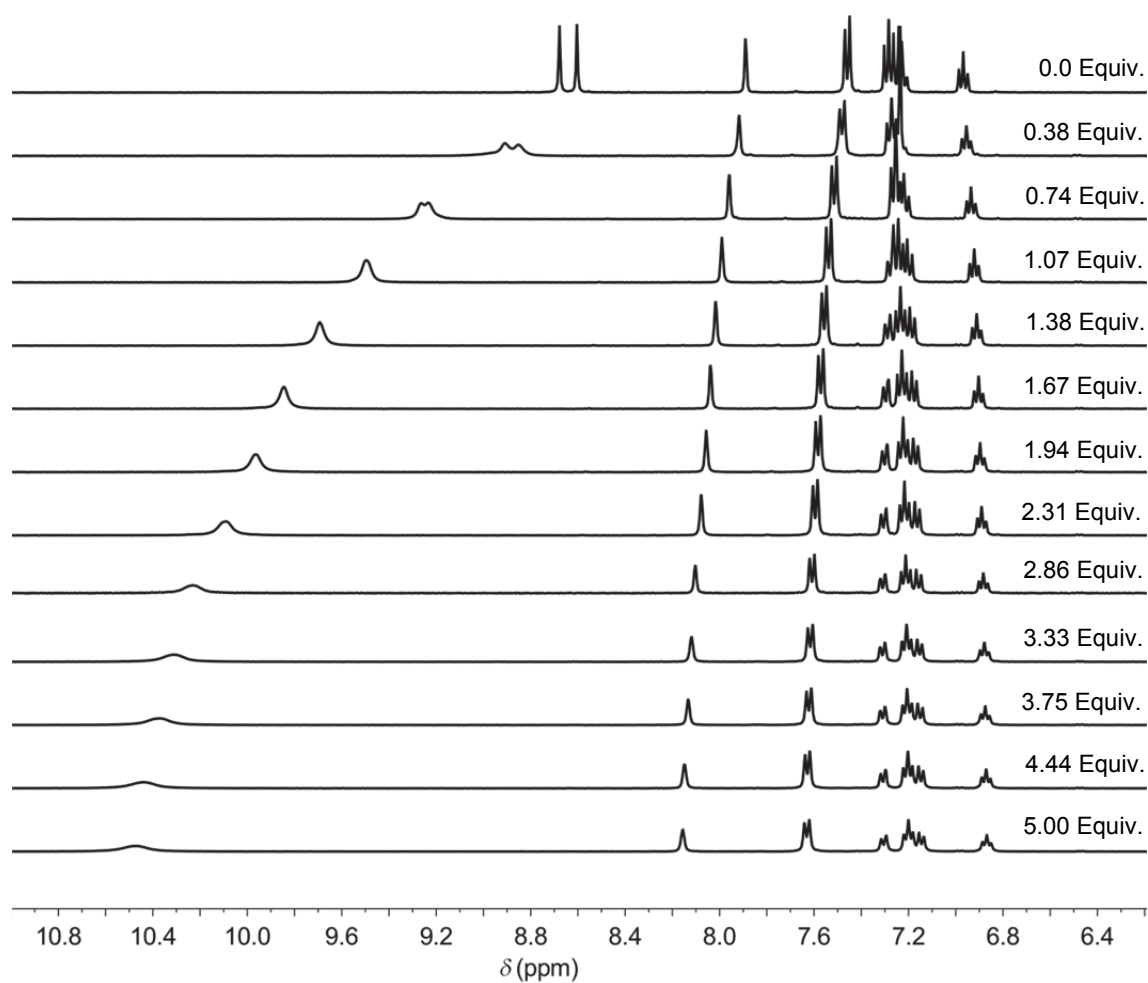

**Figure S23.**  $^1\text{H}$  NMR spectral changes (400 MHz, 293 K) in the aromatic region of (*E*)-1 ( $5 \times 10^{-3}$  M in  $\text{DMSO}-d_6/0.5\% \text{H}_2\text{O}$ ) upon the stepwise addition of  $[\text{Bu}_4\text{N}]^+[\text{H}_2\text{PO}_4]^-$  (from top to bottom: 0.0, 0.38, 0.74, 1.07, 1.38, 1.67, 1.94, 2.31, 2.86, 3.33, 3.75, 4.44, 5.00 equivalents).

## Job plot and titration curve analysis

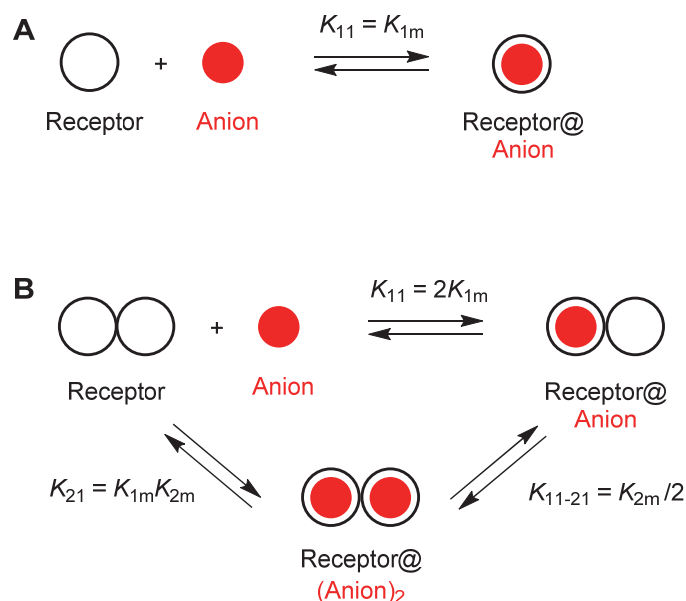

**Scheme S1.** Schematic representation of the species and equilibria involved in the formation of a 1:1 anion/receptor complex (A) and the stepwise formation of a 2:1 anion/receptor complex (B). The stability constant of the 1:1 complex ( $K_{11}$ ), 2:1 complex ( $K_{21}$ ) and the stepwise constant ( $K_{11-21}$ ) are shown and related to the microscopic binding constants ( $K_{1m}$ ,  $K_{2m}$ ). The data were fitted using HypNMR software.<sup>4</sup>

It should be noted that no clear distinction can be made between the <sup>1</sup>H NMR signals of the 1:1 and 2:1 complexes throughout the titration. In the data analysis using a 2:1 model, both urea binding sites were therefore treated as equal, i.e.  $K_{1m} = K_{2m}$  (cooperativity factor  $\alpha = 1$ ). Furthermore, the data was initially fitted to a 1:1 model to afford  $K_{11}$ , after which the stability constant of the 2:1 complex [ $K_{21} = (K_{11}/2)^2$ ] was included.

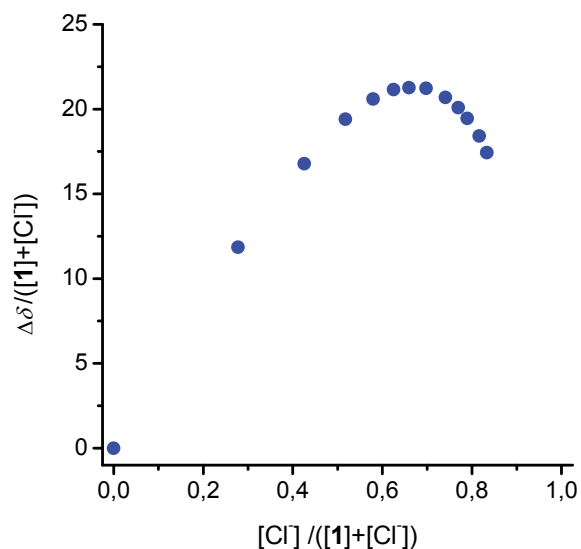

**Figure S24.** Job plot analysis generated from the addition of  $[Bu_4N]^+[Cl]^-$  to (Z)-1 indicating a 2:1 binding stoichiometry.

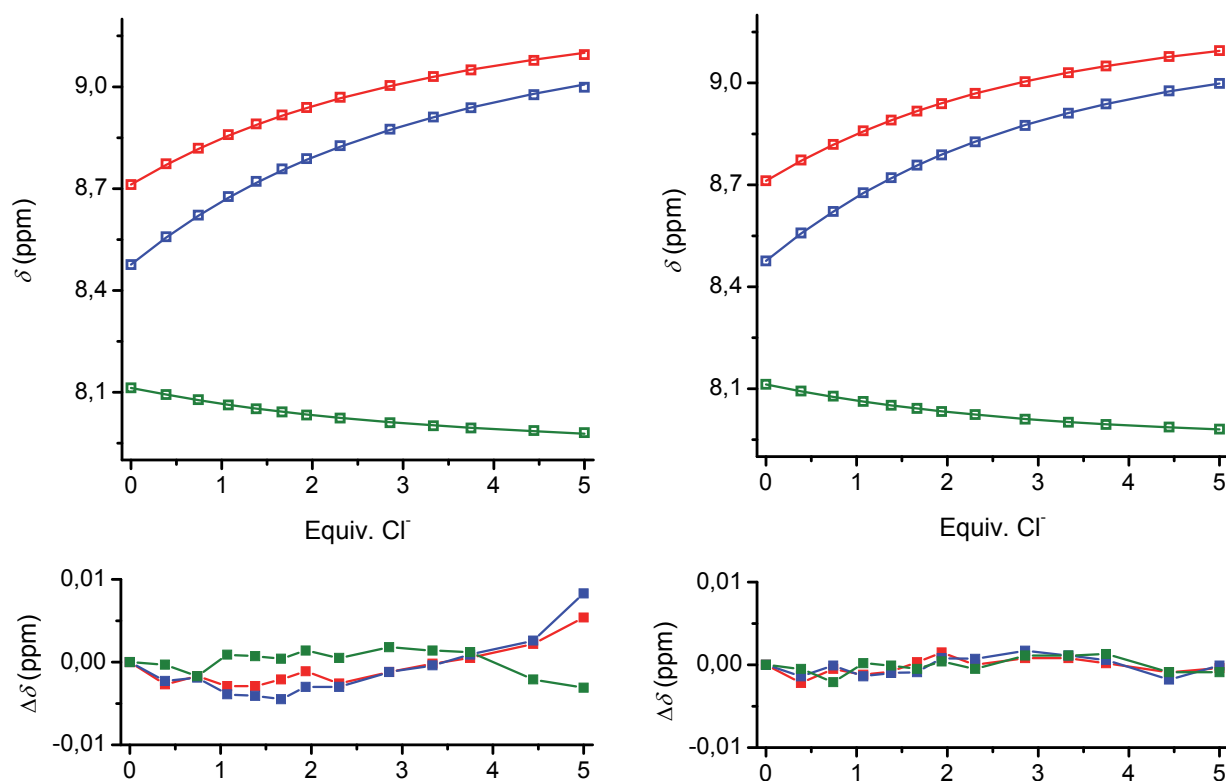

**Figure S25.** Titration curves for the addition of  $[Bu_4N]^+[Cl]^-$  to (Z)-1 and data fitting obtained by simultaneous analysis of the urea-NH (red, blue) and arom-H (green) signals using either a 1:1 (left) or a 2:1 (right) binding model. Based on the residuals analysis, the latter binding model is more likely to be correct:  $K_{1m} = 66 \text{ M}^{-1}$  (for 1:1);  $K_{1m} = 33 \text{ M}^{-1}$  (for 2:1).

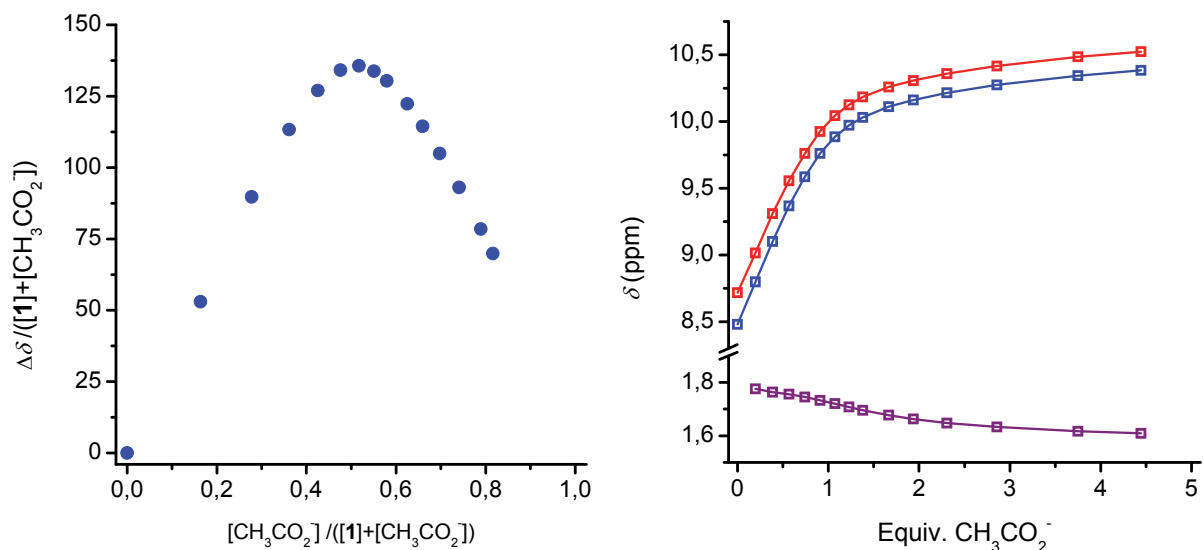

**Figure S26.** (left) Job plot analysis generated from the addition of  $[\text{Bu}_4\text{N}]^+[\text{CH}_3\text{CO}_2]^-$  to (Z)-1 indicating 1:1 binding. (right) Titration curves and data fitting to a 1:1 model obtained by analysis of the urea-NH (red, blue) and  $\text{CH}_3\text{CO}_2^-$  (purple) signals:  $K_{1m} = 1.40 \times 10^3 \text{ M}^{-1}$ .

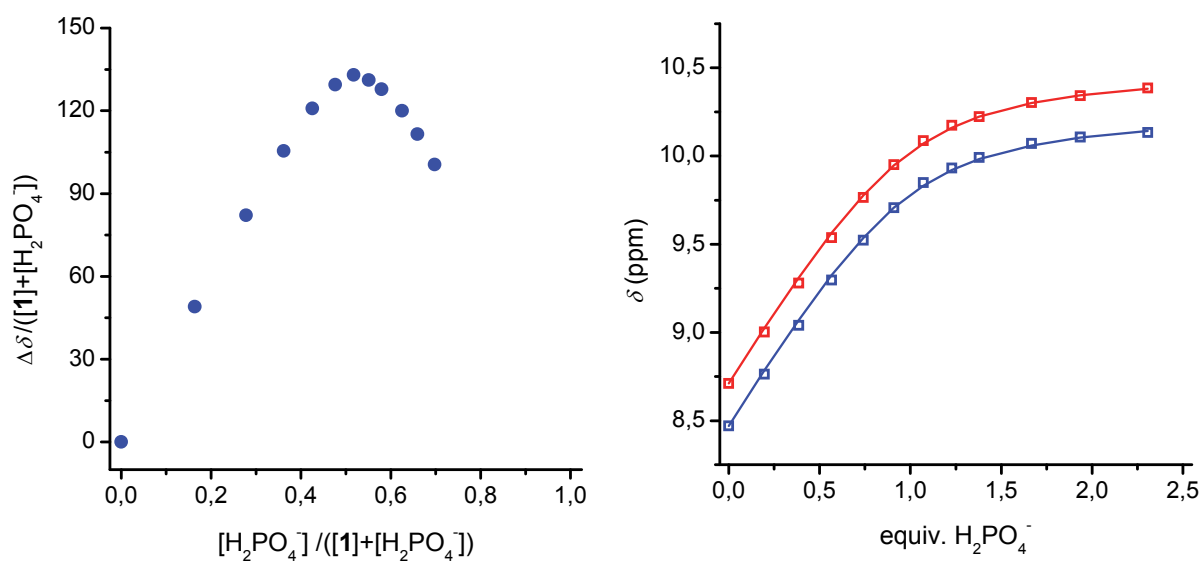

**Figure S27.** (left) Job plot analysis generated from the addition of  $[\text{Bu}_4\text{N}]^+[\text{H}_2\text{PO}_4]^-$  to (Z)-1 indicating 1:1 binding. (right) Titration curves and data fitting to a 1:1 model obtained by analysis of the urea-NH (red, blue) signals:  $K_{1m} = 2.02 \times 10^3 \text{ M}^{-1}$ .

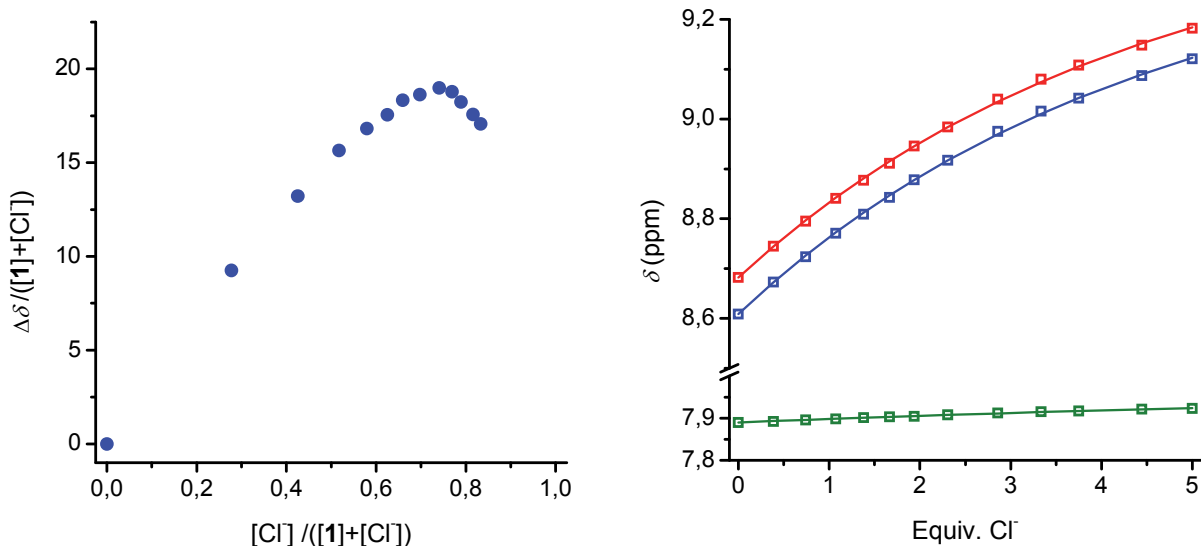

**Figure S28.** (left) Job plot analysis generated from the addition of  $[Bu_4N]^+[Cl]^-$  to (*E*)-**1** indicating 2:1 binding. (right) Titration curves and data fitting to a 2:1 model obtained by simultaneous analysis of the urea-NH (red, blue) and arom-H (green) signals:  $K_{1m} = 17 \text{ M}^{-1}$ .

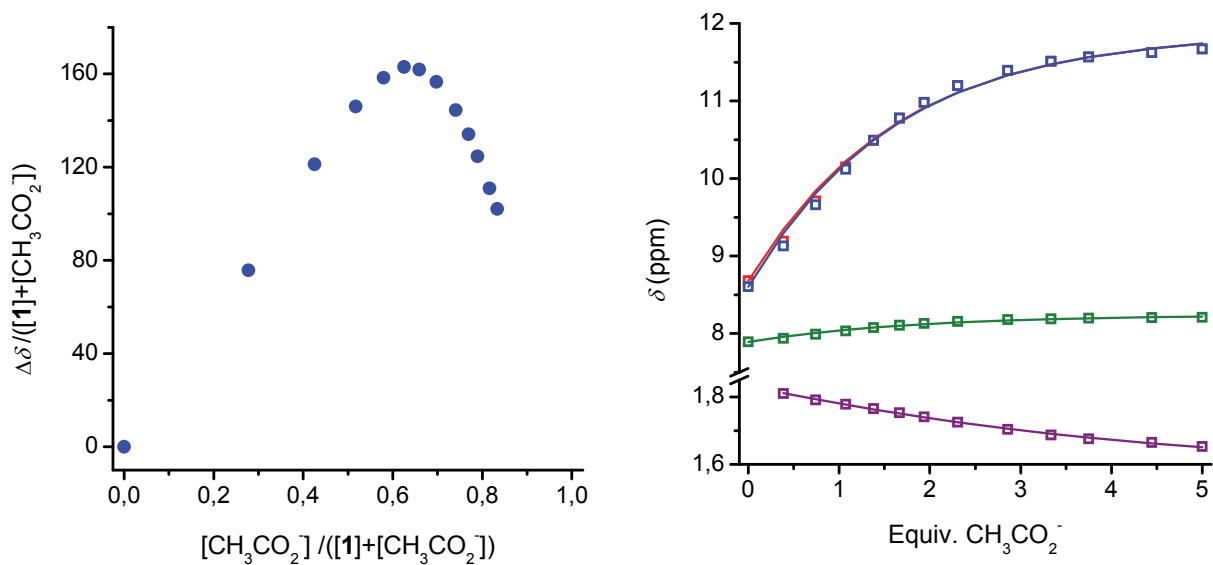

**Figure S29.** (left) Job plot analysis generated from the addition of  $[Bu_4N]^+[CH_3CO_2]^-$  to (*E*)-**1** indicating 2:1 binding. (right) Titration curves and data fitting to a 2:1 model obtained by simultaneous analysis of the urea-NH (red, blue), arom-H (green) and  $CH_3CO_2^-$  (purple) signals:  $K_{1m} = 1.04 \times 10^2 \text{ M}^{-1}$ .

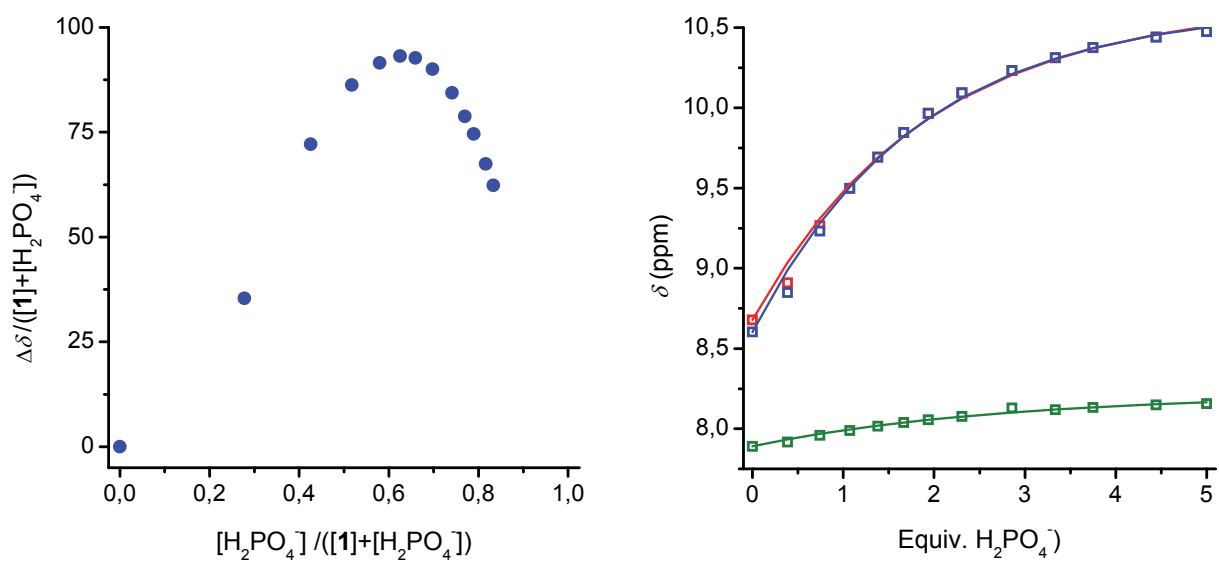

**Figure S30.** (left) Job plot analysis generated from the addition of  $[Bu_4N]^+[H_2PO_4]^-$  to (*E*)-**1** indicating 2:1 binding. (right) Titration curves and data fitting to a 2:1 model obtained by simultaneous analysis of the urea-NH (red, blue) and arom-H (green) signals:  $K_{1m} = 77 \text{ M}^{-1}$ .

## Geometry optimizations by DFT

The Gaussian 09 program<sup>5</sup> was used for geometry optimizations and the calculation of energies. Initially, different input geometries were optimized at the semi-empirical PM6 level to find the global minima. Further geometry optimizations were performed at the DFT B3LYP/6-31G++(d,p) level using tight convergence criteria and using an IEFPCM DMSO solvation model. The DFT geometries were found to have zero imaginary frequencies.

**Table S1.** Cartesian coordinates of (Z)-**1**⊃CH<sub>3</sub>CO<sub>2</sub><sup>-</sup>.

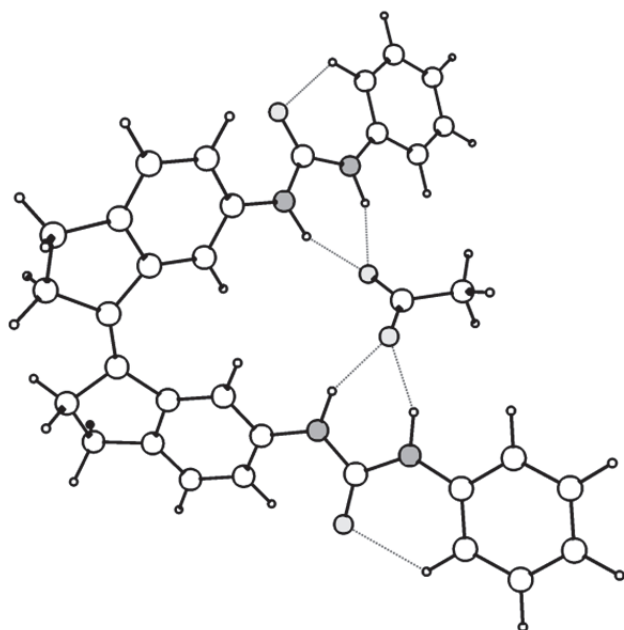

symmetry c1

| atom | X            | Y           | Z            |
|------|--------------|-------------|--------------|
| C    | -0.481458000 | 4.584697000 | -0.366837000 |
| C    | 0.655949000  | 4.563943000 | 0.375700000  |
| C    | 1.535310000  | 3.466975000 | 0.835860000  |
| C    | 2.437834000  | 3.963913000 | 1.802106000  |
| C    | 2.170430000  | 5.421034000 | 2.092233000  |
| C    | 1.290556000  | 5.856855000 | 0.896109000  |
| C    | -1.398904000 | 3.520589000 | -0.830672000 |
| C    | -2.272422000 | 4.049186000 | -1.806835000 |
| C    | -1.948211000 | 5.494880000 | -2.096196000 |
| C    | -1.065768000 | 5.899493000 | -0.891000000 |
| C    | 1.678336000  | 2.150322000 | 0.372767000  |
| C    | 2.690959000  | 1.327445000 | 0.894436000  |
| C    | 3.552418000  | 1.820153000 | 1.891628000  |
| C    | 3.428096000  | 3.140789000 | 2.331618000  |
| C    | -1.596919000 | 2.212073000 | -0.365030000 |



|   |              |              |              |
|---|--------------|--------------|--------------|
| C | -2.635804000 | 1.426154000  | -0.893824000 |
| C | -3.466660000 | 1.948593000  | -1.902286000 |
| C | -3.286951000 | 3.262186000  | -2.344530000 |
| C | -3.980642000 | -0.570203000 | -0.259365000 |
| O | -5.082295000 | -0.108733000 | -0.587241000 |
| C | 3.956681000  | -0.705826000 | 0.222167000  |
| O | 5.082269000  | -0.260117000 | 0.483633000  |
| N | -2.787321000 | 0.111127000  | -0.401772000 |
| N | 2.786626000  | 0.003807000  | 0.410042000  |
| N | -3.801795000 | -1.823413000 | 0.294716000  |
| N | 3.724333000  | -1.965933000 | -0.295163000 |
| C | -7.028583000 | -3.687305000 | 0.662409000  |
| C | -6.580681000 | -4.844605000 | 1.304653000  |
| C | -5.217391000 | -4.968770000 | 1.597583000  |
| C | -6.145585000 | -2.661161000 | 0.310809000  |
| C | -4.774935000 | -2.785717000 | 0.607084000  |
| C | -4.325010000 | -3.954794000 | 1.255346000  |
| C | 4.160718000  | -4.104712000 | -1.283623000 |
| C | 5.015492000  | -5.138409000 | -1.661321000 |
| C | 6.391637000  | -5.045902000 | -1.421802000 |
| C | 4.662041000  | -2.948243000 | -0.650759000 |
| C | 6.045802000  | -2.855316000 | -0.408938000 |
| C | 6.890805000  | -3.900211000 | -0.796692000 |
| O | 0.890480000  | -1.919657000 | -0.526051000 |
| C | -0.050717000 | -2.458176000 | 0.132527000  |
| O | -0.987570000 | -1.814653000 | 0.698216000  |
| C | -0.082846000 | -3.981855000 | 0.233184000  |
| H | 4.323620000  | 1.178208000  | 2.296084000  |
| H | -4.258352000 | 1.336164000  | -2.311978000 |
| H | 3.087946000  | 6.010411000  | 2.186293000  |
| H | 1.617454000  | 5.534243000  | 3.035087000  |
| H | 0.544210000  | 6.605305000  | 1.175274000  |
| H | -2.842218000 | 6.117641000  | -2.200922000 |
| H | -1.380950000 | 5.586297000  | -3.032935000 |
| H | -0.291531000 | 6.622160000  | -1.161906000 |
| H | -1.953610000 | -0.345833000 | -0.017116000 |
| H | 1.925795000  | -0.436116000 | 0.069820000  |
| H | 1.922392000  | 6.306886000  | 0.116596000  |
| H | -1.689670000 | 6.370045000  | -0.117199000 |
| H | 1.046854000  | 1.764704000  | -0.419722000 |
| H | 4.115743000  | 3.521125000  | 3.082943000  |
| H | -0.988233000 | 1.805936000  | 0.435111000  |
| H | -3.952156000 | 3.665791000  | -3.103905000 |
| H | -2.834674000 | -2.067920000 | 0.532857000  |
| H | 2.740476000  | -2.198423000 | -0.467971000 |
| H | -8.083035000 | -3.572654000 | 0.425738000  |
| H | -7.276861000 | -5.633656000 | 1.571941000  |
| H | -4.843502000 | -5.858423000 | 2.096617000  |
| H | -6.504512000 | -1.770914000 | -0.184989000 |
| H | -3.269496000 | -4.060987000 | 1.489933000  |

|   |              |              |              |
|---|--------------|--------------|--------------|
| H | 3.095107000  | -4.185137000 | -1.479987000 |
| H | 4.602148000  | -6.017844000 | -2.147122000 |
| H | 7.058591000  | -5.850074000 | -1.717071000 |
| H | 6.444144000  | -1.974464000 | 0.073435000  |
| H | 7.956090000  | -3.810044000 | -0.601678000 |
| H | 0.893472000  | -4.419920000 | 0.016601000  |
| H | -0.802482000 | -4.368311000 | -0.498356000 |
| H | -0.420179000 | -4.296487000 | 1.224253000  |

-----  
Sum of electronic and zero-point Energies= -1834.007803

**Table S2.** Cartesian coordinates of (Z)-**1**-H<sub>2</sub>PO<sub>4</sub><sup>-</sup>.

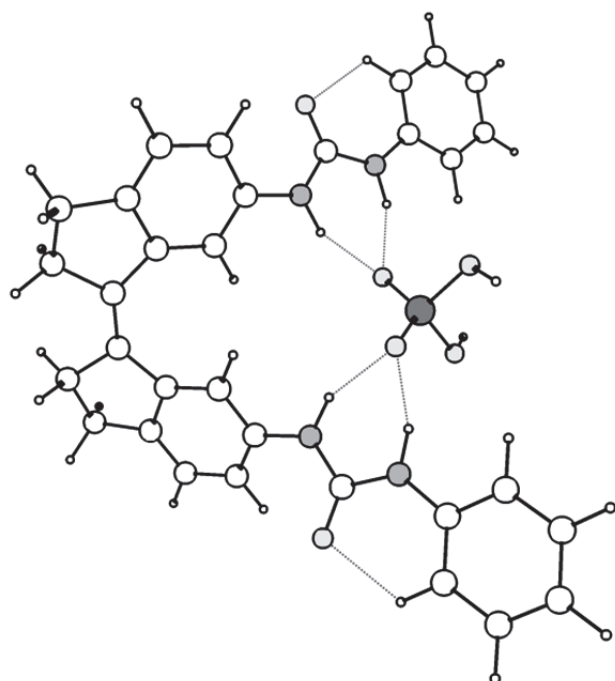

symmetry c1

| atom | X            | Y           | Z            |
|------|--------------|-------------|--------------|
| C    | 0.591779000  | 4.700275000 | 0.390979000  |
| C    | -0.531371000 | 4.709178000 | -0.372753000 |
| C    | -1.432631000 | 3.638013000 | -0.852481000 |
| C    | -2.289913000 | 4.160919000 | -1.846146000 |
| C    | -1.964727000 | 5.606502000 | -2.134011000 |
| C    | -1.118351000 | 6.019103000 | -0.906215000 |
| C    | 1.485163000  | 3.616257000 | 0.855623000  |
| C    | 2.358853000  | 4.122748000 | 1.843423000  |
| C    | 2.050804000  | 5.568818000 | 2.147079000  |
| C    | 1.193185000  | 6.000014000 | 0.933629000  |
| C    | -1.638667000 | 2.332642000 | -0.380430000 |
| C    | -2.676594000 | 1.548569000 | -0.914719000 |

|   |              |              |              |
|---|--------------|--------------|--------------|
| C | -3.487878000 | 2.063726000  | -1.942626000 |
| C | -3.296063000 | 3.371697000  | -2.395321000 |
| C | 1.670844000  | 2.311439000  | 0.373713000  |
| C | 2.705190000  | 1.512589000  | 0.891884000  |
| C | 3.535719000  | 2.012670000  | 1.911640000  |
| C | 3.363777000  | 3.319653000  | 2.374875000  |
| C | 4.057638000  | -0.468721000 | 0.221345000  |
| O | 5.159673000  | -0.000232000 | 0.535619000  |
| C | -4.062911000 | -0.420927000 | -0.277591000 |
| O | -5.150814000 | 0.050675000  | -0.633548000 |
| N | 2.861053000  | 0.205852000  | 0.378398000  |
| N | -2.856341000 | 0.242845000  | -0.406759000 |
| N | 3.876760000  | -1.721751000 | -0.329575000 |
| N | -3.909706000 | -1.667127000 | 0.296264000  |
| C | 7.107456000  | -3.553908000 | -0.800968000 |
| C | 6.647637000  | -4.724579000 | -1.409712000 |
| C | 5.275219000  | -4.868402000 | -1.645566000 |
| C | 6.227164000  | -2.533382000 | -0.427001000 |
| C | 4.847416000  | -2.678457000 | -0.665157000 |
| C | 4.385164000  | -3.860747000 | -1.279659000 |
| C | -4.467748000 | -3.786550000 | 1.262371000  |
| C | -5.377197000 | -4.783732000 | 1.608751000  |
| C | -6.737950000 | -4.638373000 | 1.313677000  |
| C | -4.898312000 | -2.613438000 | 0.608500000  |
| C | -6.266265000 | -2.466923000 | 0.310629000  |
| C | -7.166326000 | -3.476936000 | 0.665598000  |
| H | -4.276639000 | 1.451225000  | -2.357494000 |
| H | 4.322199000  | 1.388441000  | 2.313672000  |
| H | -2.858289000 | 6.224493000  | -2.266498000 |
| H | -1.371132000 | 5.696553000  | -3.054456000 |
| H | -0.346668000 | 6.752222000  | -1.155202000 |
| H | 2.951670000  | 6.177394000  | 2.273585000  |
| H | 1.469907000  | 5.656276000  | 3.075819000  |
| H | 0.428716000  | 6.734798000  | 1.199577000  |
| H | 2.032180000  | -0.251280000 | -0.006764000 |
| H | -2.044320000 | -0.214870000 | 0.012028000  |
| H | -1.768283000 | 6.478744000  | -0.147384000 |
| H | 1.837058000  | 6.464684000  | 0.172743000  |
| H | -1.039997000 | 1.931658000  | 0.430542000  |
| H | -3.947737000 | 3.770315000  | -3.168873000 |
| H | 1.058308000  | 1.921590000  | -0.432225000 |
| H | 4.028779000  | 3.706407000  | 3.143082000  |
| H | 2.905543000  | -1.974482000 | -0.535637000 |
| H | -2.948765000 | -1.921157000 | 0.545258000  |
| H | 8.169211000  | -3.424010000 | -0.609161000 |
| H | 7.341833000  | -5.509031000 | -1.695068000 |
| H | 4.892359000  | -5.768846000 | -2.117681000 |
| H | 6.594842000  | -1.632848000 | 0.043228000  |
| H | 3.322157000  | -3.982050000 | -1.469346000 |
| H | -3.414098000 | -3.909099000 | 1.497742000  |

|   |              |              |              |
|---|--------------|--------------|--------------|
| H | -5.018677000 | -5.677259000 | 2.112093000  |
| H | -7.447250000 | -5.414668000 | 1.583799000  |
| H | -6.609698000 | -1.573258000 | -0.190035000 |
| H | -8.218548000 | -3.346085000 | 0.427468000  |
| O | -1.106332000 | -1.741208000 | 0.803339000  |
| P | -0.012590000 | -2.511065000 | 0.089308000  |
| O | 1.048264000  | -1.785486000 | -0.715119000 |
| O | -0.788336000 | -3.598306000 | -0.865364000 |
| O | 0.807886000  | -3.439292000 | 1.166686000  |
| H | -0.183976000 | -4.026736000 | -1.490439000 |
| H | 0.222453000  | -3.809524000 | 1.844659000  |

-----  
Sum of electronic and zero-point Energies= -2249.117127

## References

- (1) Feldmeier, C.; Bartling, H.; Riedle, E. Gschwind, R. M. *J. Magn. Reson.* **2013**, *232*, 39-44.
- (2) Montalti, M.; Credi, A.; Prodi, L.; Gandolfi, M. T. *Handbook of Photochemistry, Third Edition.*, CRC Press, Boca Raton, FL, **2006**.
- (3) Hatchard, C. G.; Parker, C. A. *Proc. Roy. Soc.* **1956**, *A235*, 518-536.
- (4) C. Frassinetti, S. Ghelli, P. Gans, A. Sabatini, M. S. Moruzzi and A. Vacca, *Anal. Biochem.* **1995**, *231*, 374-382.
- (5) Gaussian 09, Revision D.01, Frisch, M. J.; Trucks, G. W.; Schlegel, H. B.; Scuseria, G. E.; Robb, M. A.; Cheeseman, J. R.; Scalmani, G.; Barone, V.; Mennucci, B.; Petersson, G. A.; Nakatsuji, H.; Caricato, M.; Li, X.; Hratchian, H. P.; Izmaylov, A. F.; Bloino, J.; Zheng, G.; Sonnenberg, J. L.; Hada, M.; Ehara, M.; Toyota, K.; Fukuda, R.; Hasegawa, J.; Ishida, M.; Nakajima, T.; Honda, Y.; Kitao, O.; Nakai, H.; Vreven, T.; Montgomery, J. A., Jr.; Peralta, J. E.; Ogliaro, F.; Bearpark, M.; Heyd, J. J.; Brothers, E.; Kudin, K. N.; Staroverov, Keith, T.; V. N.; Kobayashi, R.; Normand, J.; Raghavachari, K.; Rendell, A.; Burant, J. C.; Iyengar, S. S.; Tomasi, J.; Cossi, M.; Rega, N.; Millam, J. M.; Klene, M.; Knox, J. E.; Cross, J. B.; Bakken, V.; Adamo, C.; Jaramillo, J.; Gomperts, R.; Stratmann, R. E.; Yazyev, O.; Austin, A. J.; Cammi, R.; Pomelli, C.; Ochterski, J. W.; Martin, R. L.; Morokuma, K.; Zakrzewski, V. G.; Voth, G. A.; Salvador, P.; Dannenberg, J. J.; Dapprich, S.; Daniels, A. D.; Farkas, Ö.; Foresman, J. B.; Ortiz, J. V.; Cioslowski, J.; Fox, D. J. Gaussian, Inc., Wallingford CT, **2013**.
